# Supplementary material for: Catalyst-free, one-pot, four-component green synthesis of functionalized 1-(2-fluorophenyl)-1,4-dihydropyridines under ultrasound irradiation
Source: Royal Society of Chemistry journal article supplement (doi:10.1039/c5nj03574k), 2016-01-01
Supplement: c5nj03574k1.pdf [file c5nj03574k1.pdf]

## **Catalyst-free, one-pot, four-component green synthesis of functionalized 1-(2-fluorophenyl)-1,4-dihydropyridines under ultrasound irradiation**

**Nhlanhla Shabalala, Suresh Maddila and Sreekantha B. Jonnalagadda\***

\*School of Chemistry and Physics, University of Kwa-Zulu Natal, Westville Campus, Private  
Bag X 54001, Durban, 4000, South Africa.

**Corresponding Author:** \*Prof. Sreekantha B. Jonnalagadda  
School of Chemistry & Physics,  
University of KwaZulu-Natal,  
Durban 4000, South Africa.  
Tel.: +27 31 2607325,  
Fax: +27 31 2603091,  
Email: [jonnalagaddas@ukzn.ac.za](mailto:jonnalagaddas@ukzn.ac.za)

| <b>Contents</b>                                                    | <b>Pages</b> |
|--------------------------------------------------------------------|--------------|
| <b>Materials, methods and instruments</b>                          | <b>2</b>     |
| <b>Spectra's of functionalized 1,4-dihydropyridine derivatives</b> | <b>3-24</b>  |

## Materials, methods and instruments

All chemicals used were reagent grade and were used as received without further purification.  $^1\text{H}$  NMR,  $^{13}\text{C}$  NMR,  $^{15}\text{N}$  NMR and  $^{19}\text{F}$  NMR spectra were recorded at 25 °C at 400 MHz, 100 MHz, 40.55 MHz and 376.58 MHz (Bruker Avance) instrument respectively, using TMS as internal standard. Chemical shifts are given in parts per million (ppm). The FT-IR spectroscopy of samples was carried out on a Perkin Elmer Precisely 100 FT-IR spectrometer in the 400-4000  $\text{cm}^{-1}$  region. The HRMS were recorded on a waters micromass LCT premier mass spectrometer using electrospray ionization in the positive or negative mode. The ultrasonic assisted reactions are carried out in a “Spectralab model UMC 20 Ultrasonic cleaner” with a frequency of 40 kHz and a nominal power 250 W. Melting points were recorded on a hot stage melting point apparatus Ernst Leitz Wetzlar, Germany and were uncorrected. All the reactions and the purity of products were monitored using thin layer chromatography (TLC) on aluminum-backed plates coated with Merck Kieselgel 60 F254 silica gel, visualizing the spots under ultraviolet light and iodine chamber.

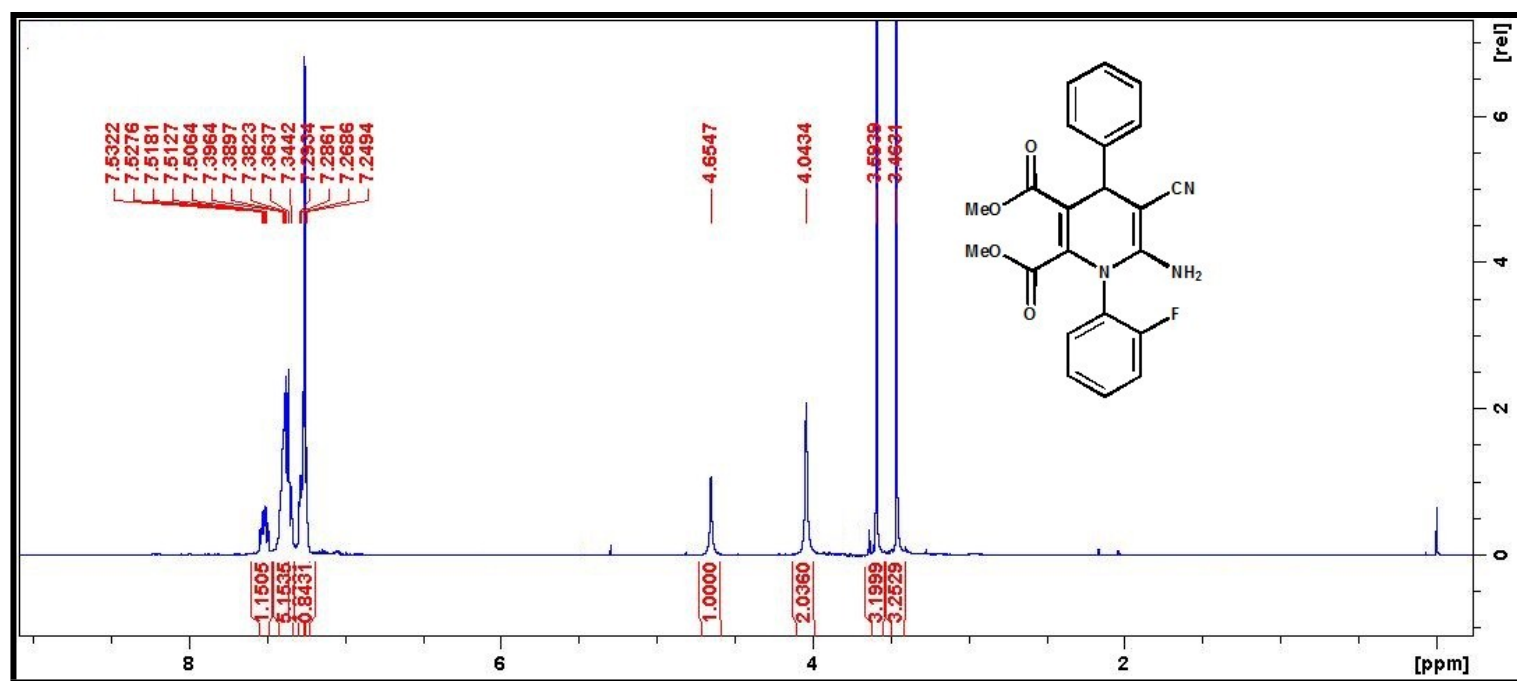

<sup>1</sup>H NMR spectra of **5a**

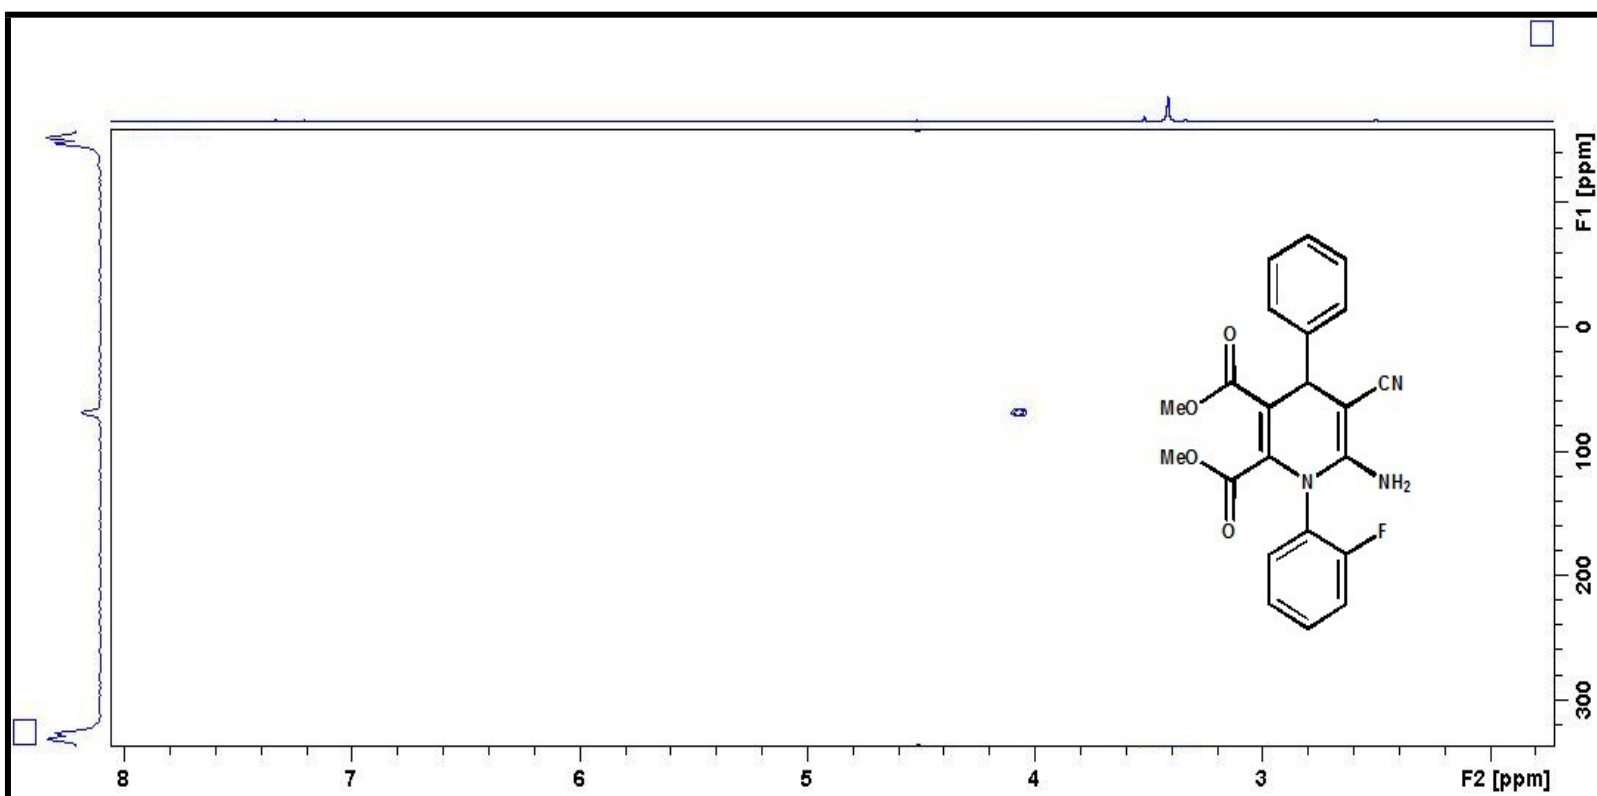

<sup>15</sup>N NMR spectra of **5a**

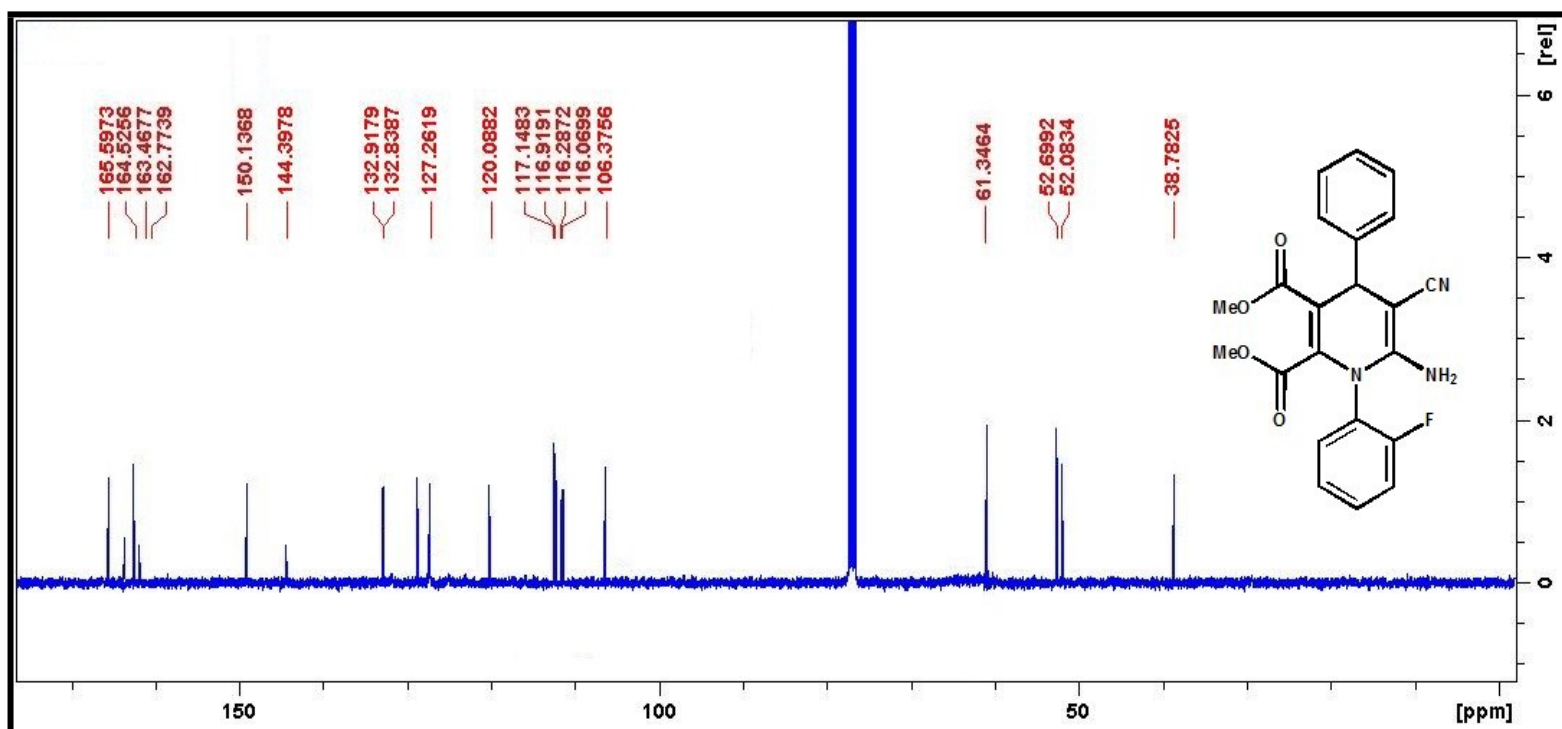

<sup>13</sup>C NMR spectra of 5a

## Elemental Composition Report

Page 1

### Single Mass Analysis

Tolerance = 5.0 PPM / DBE: min = -1.5, max = 100.0

Element prediction: Off

Number of isotope peaks used for i-FIT = 3

Monoisotopic Mass, Even Electron Ions

12 formula(e) evaluated with 1 results within limits (up to 20 closest results for each mass)

Elements Used:

C: 20-25 H: 15-20 N: 0-5 O: 0-5 F: 1-1 Na: 1-1

2FA19 44 (1.451) Cm (1:61)

TOF MS ES+

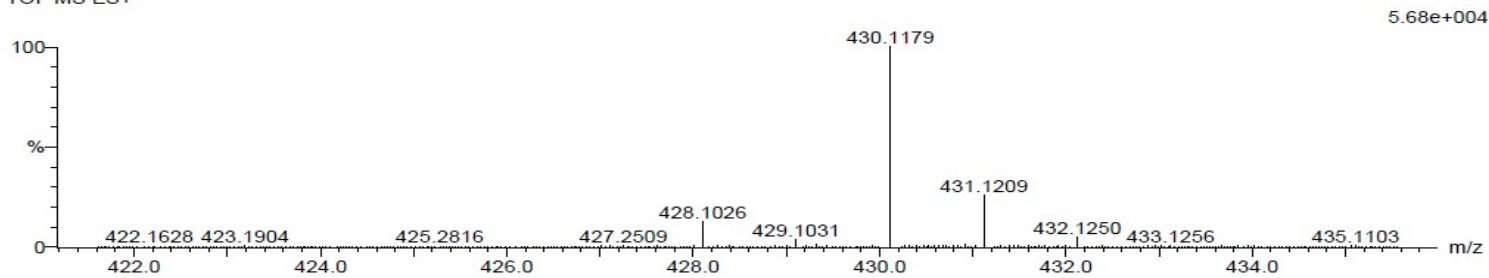

Minimum:

Maximum:

5.0

5.0

-1.5

100.0

Mass Calc. Mass mDa PPM DBE i-FIT i-FIT (Norm) Formula

430.1179 430.1179 0.0 0.0 14.5 489.0 0.0 C22 H18 N3 O4 F Na

HRMS spectra of 5a

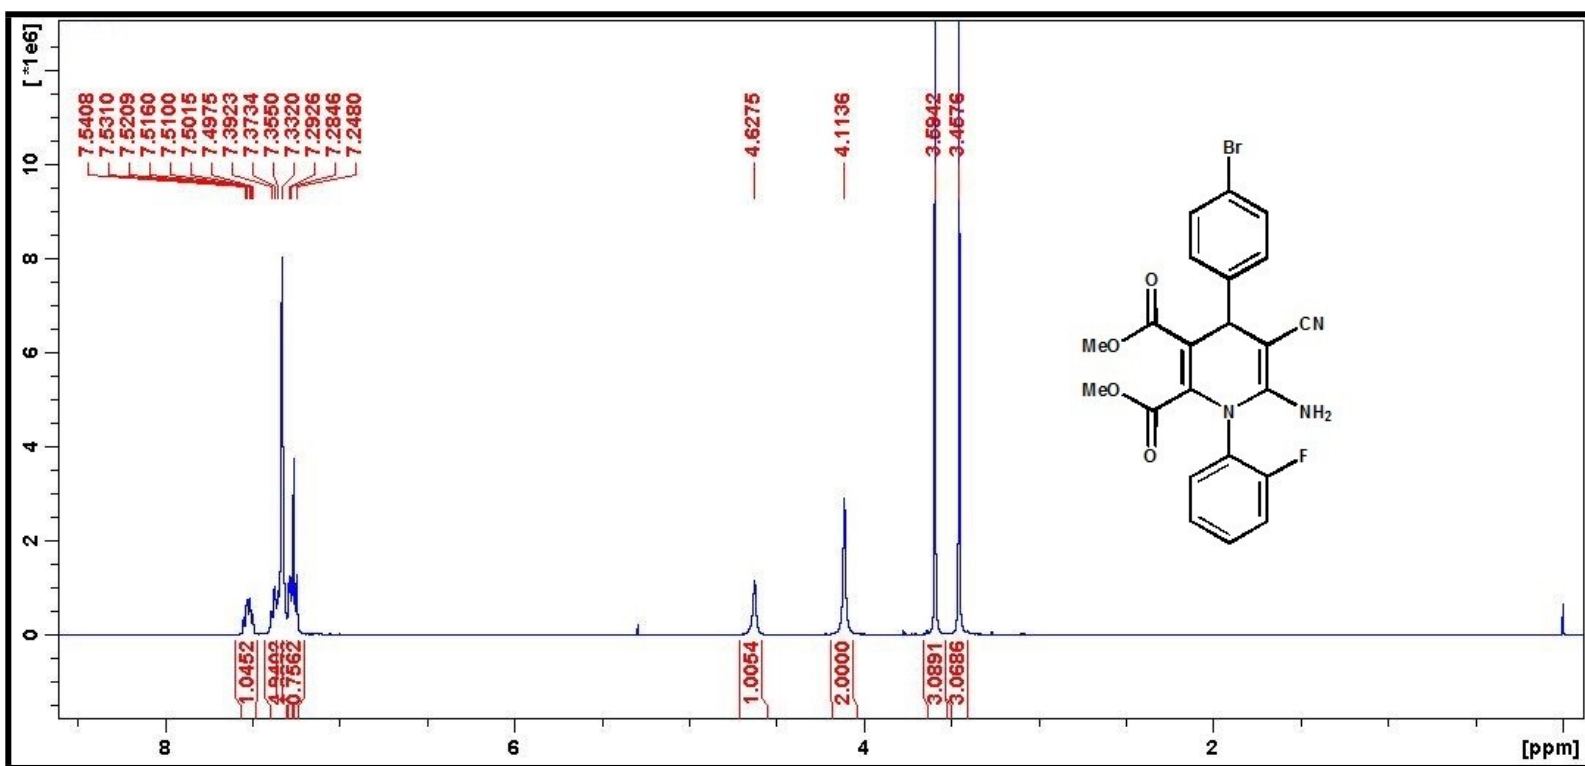

<sup>1</sup>H NMR spectra of **5b**

<sup>15</sup>N NMR spectra of **5b**

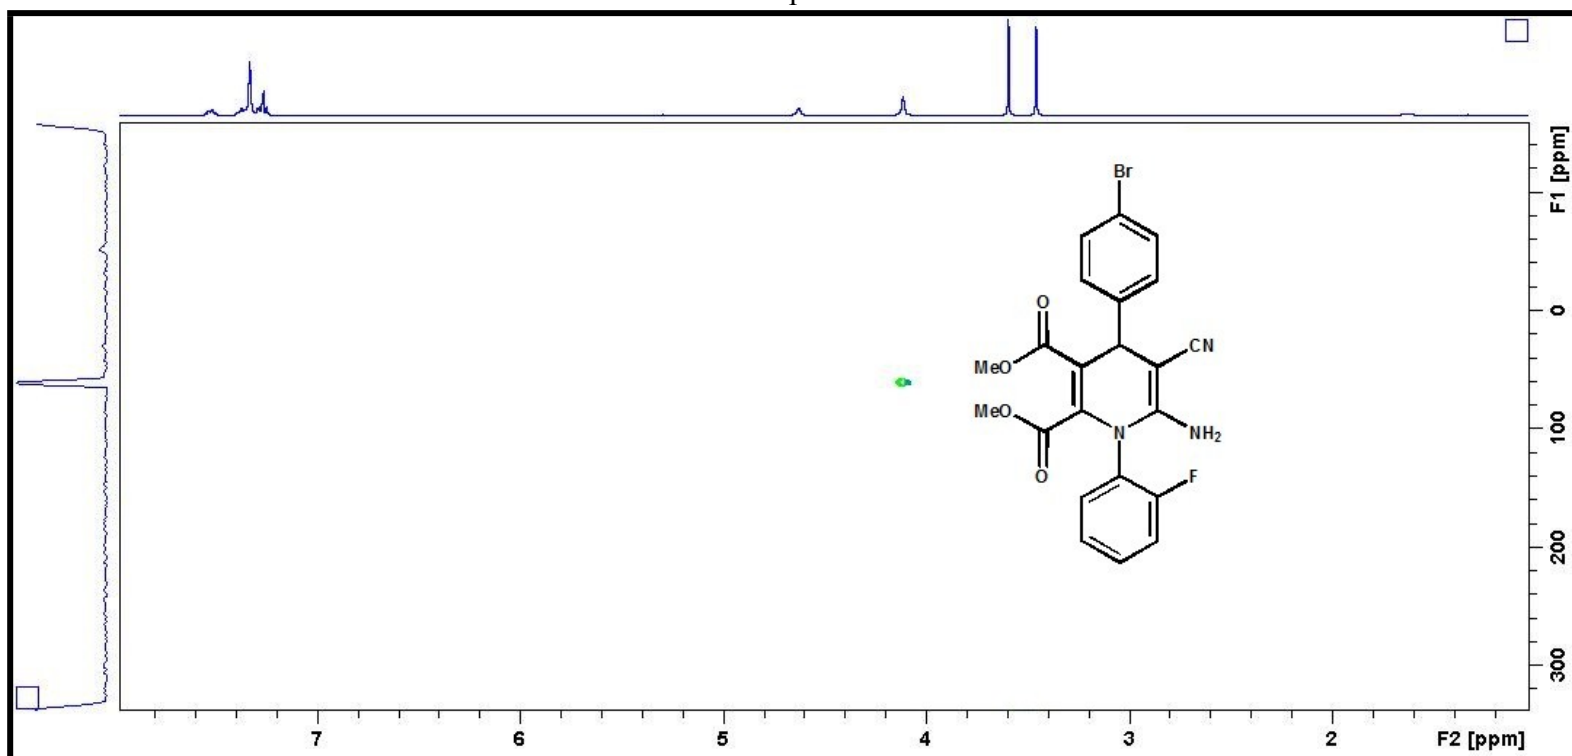

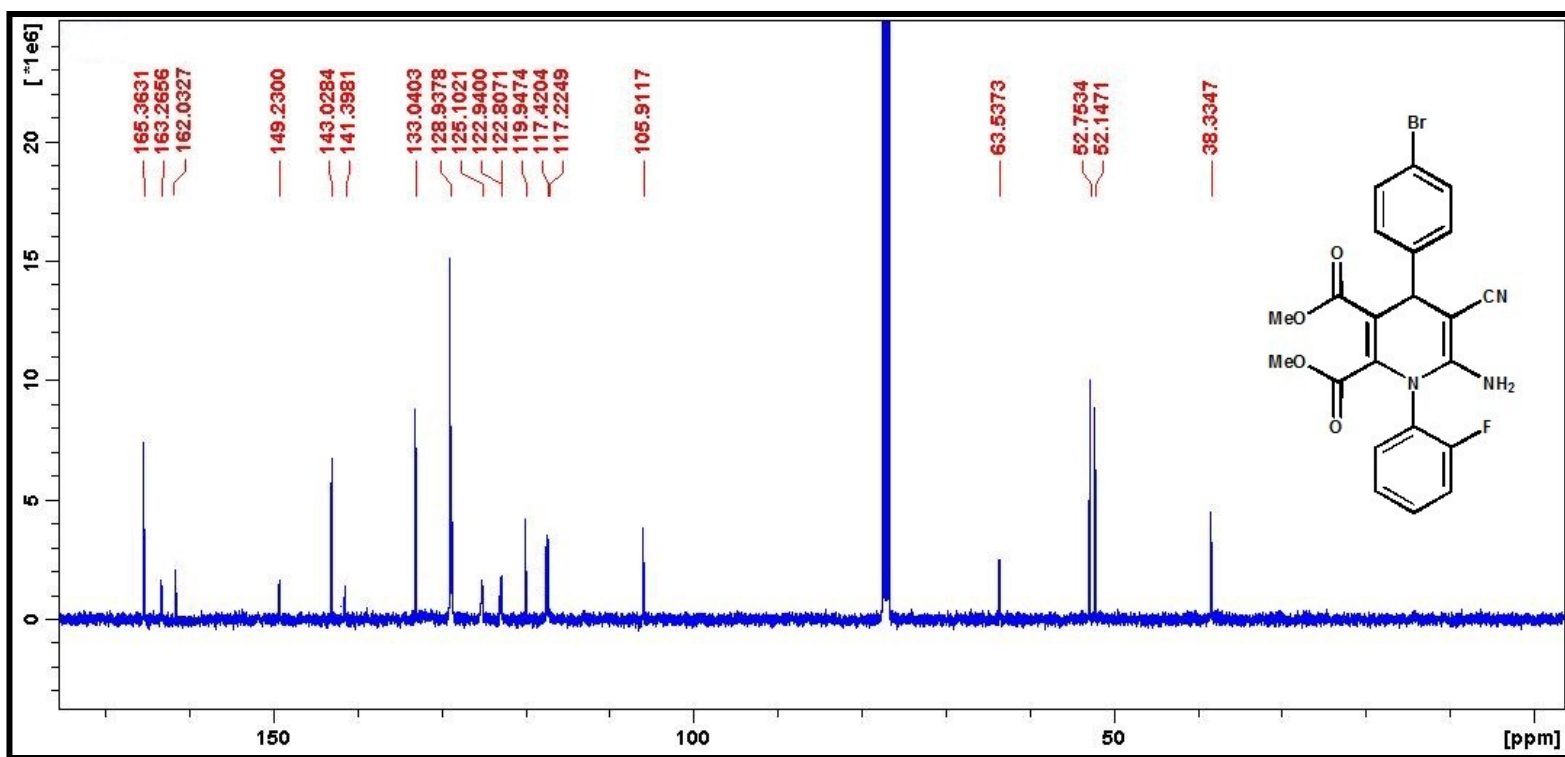

<sup>13</sup>C NMR spectra of **5b**

## Elemental Composition Report

Page 1

### Single Mass Analysis

Tolerance = 5.0 PPM / DBE: min = -1.5, max = 100.0

Element prediction: Off

Number of isotope peaks used for i-FIT = 3

Monoisotopic Mass, Even Electron Ions

37 formula(e) evaluated with 1 results within limits (up to 20 closest results for each mass)

Elements Used:

C: 20-25 H: 15-20 N: 0-5 O: 0-5 F: 1-1 Br: 0-1

F4 2 (0.034) Cm (1:61)

TOF MS ES+

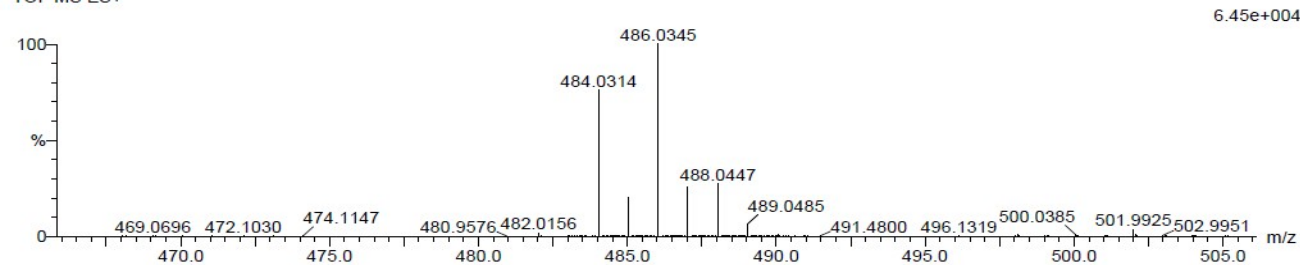

Minimum:

Maximum:

-1.5

100.0

Mass

Calc. Mass

mDa

PPM

DBE

i-FIT

i-FIT (Norm)

Formula

484.0314

484.0308

0.6

1.2

15.5

485.1

0.0

C22 H16 N3 O4 F Br

HRMS spectra of **5b**

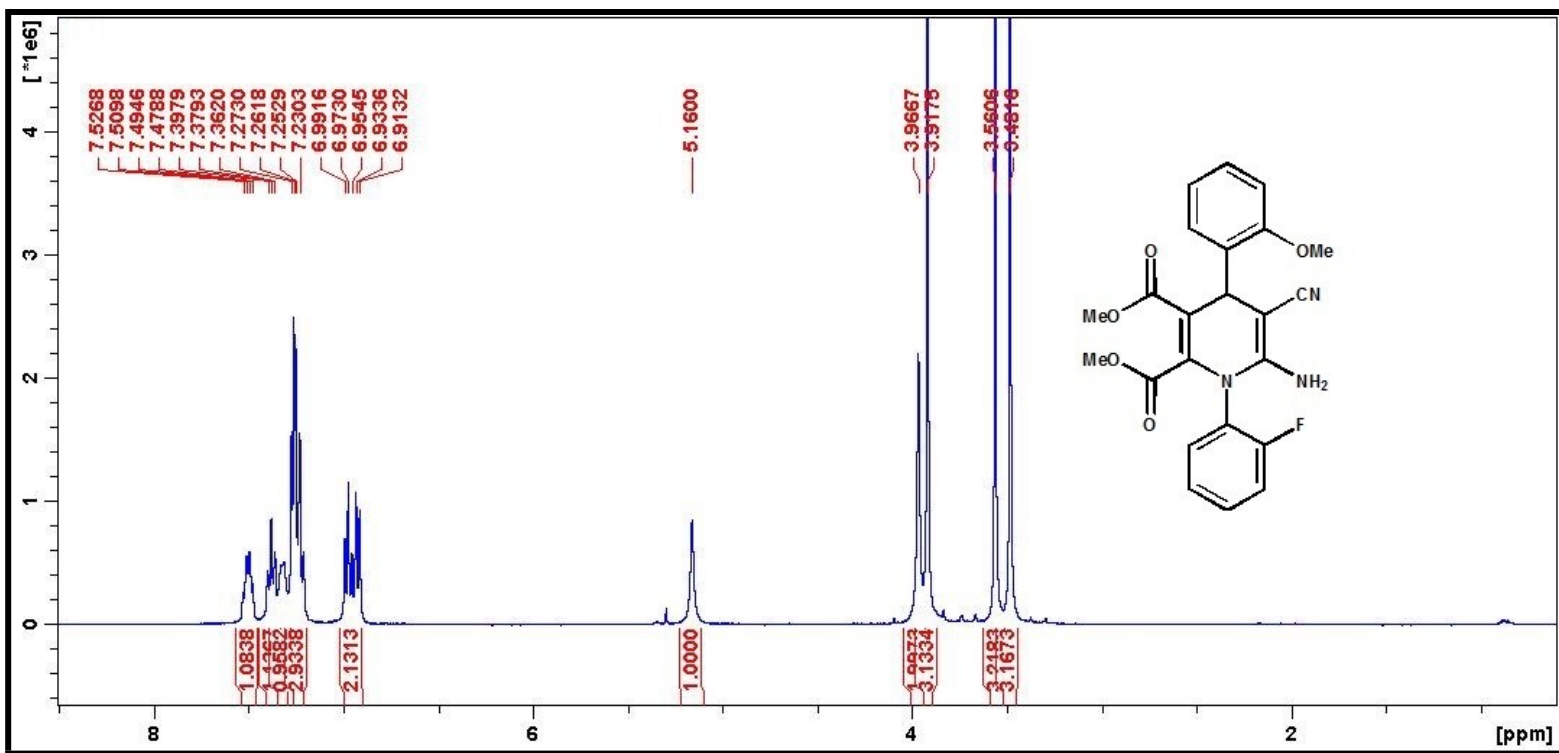

<sup>1</sup>H NMR spectra of 5c

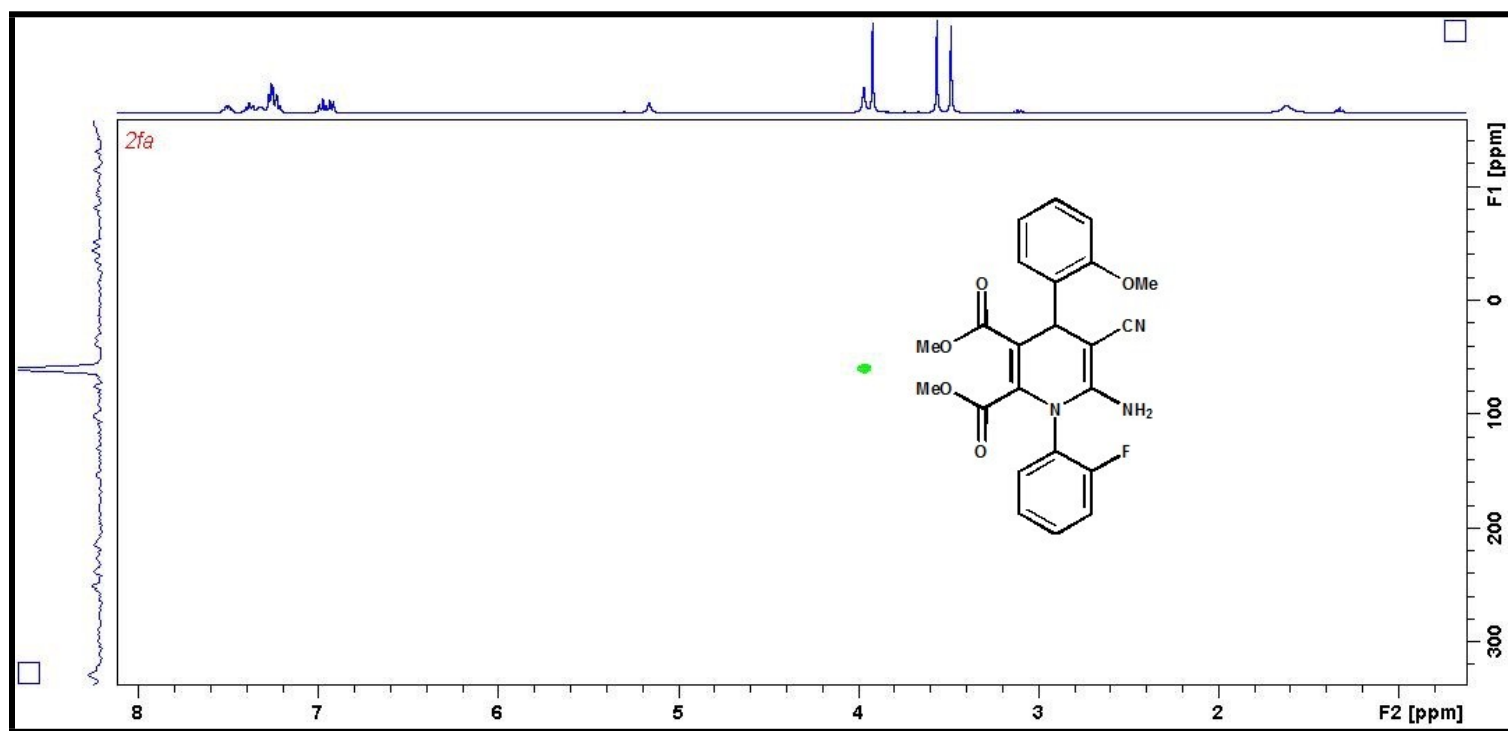

<sup>15</sup>N NMR spectra of 5c



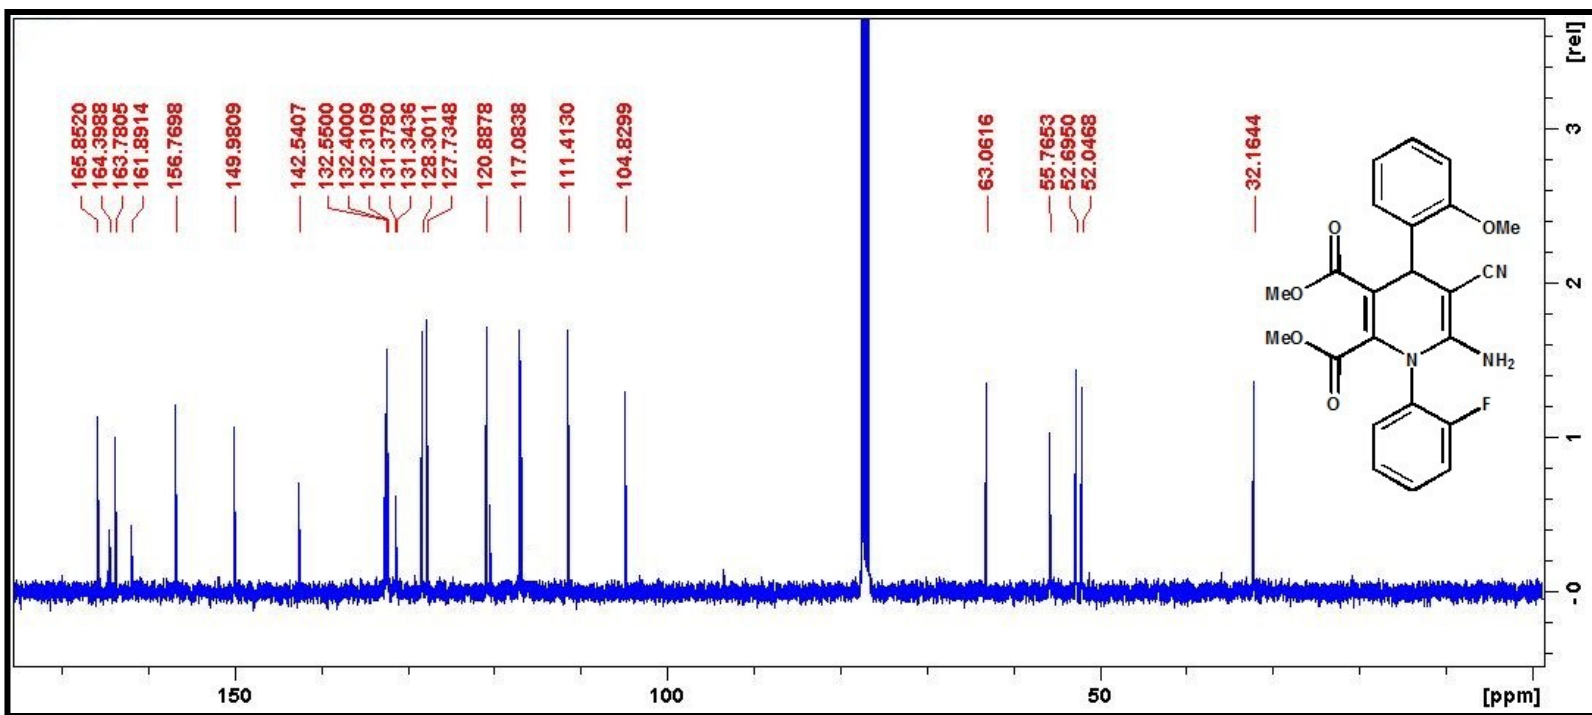

<sup>13</sup>C NMR spectra of **5c**

## Elemental Composition Report

Page 1

### Single Mass Analysis

Tolerance = 5.0 PPM / DBE: min = -1.5, max = 100.0

Element prediction: Off

Number of isotope peaks used for i-FIT = 3

Monoisotopic Mass, Even Electron Ions

38 formula(e) evaluated with 1 results within limits (up to 20 closest results for each mass)

Elements Used:

C: 20-25 H: 15-25 N: 0-5 O: 0-10 F: 1-1 Na: 1-1

2FA2 14 (0.439) Cm (1.61)

TOF MS ES+

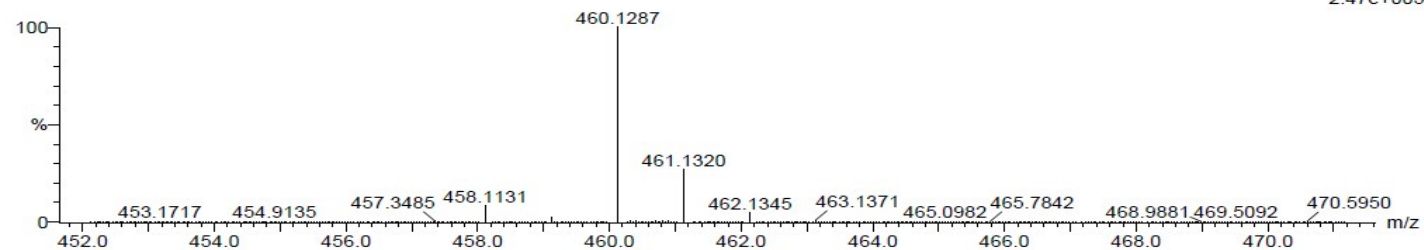

Minimum:

Maximum:

5.0 5.0 -1.5  
100.0

| Mass     | Calc. Mass | mDa | PPM | DBE  | i-FIT | i-FIT (Norm) | Formula            |
|----------|------------|-----|-----|------|-------|--------------|--------------------|
| 460.1287 | 460.1285   | 0.2 | 0.4 | 14.5 | 554.4 | 0.0          | C23 H20 N3 O5 F Na |

HRMS spectra of **5c**



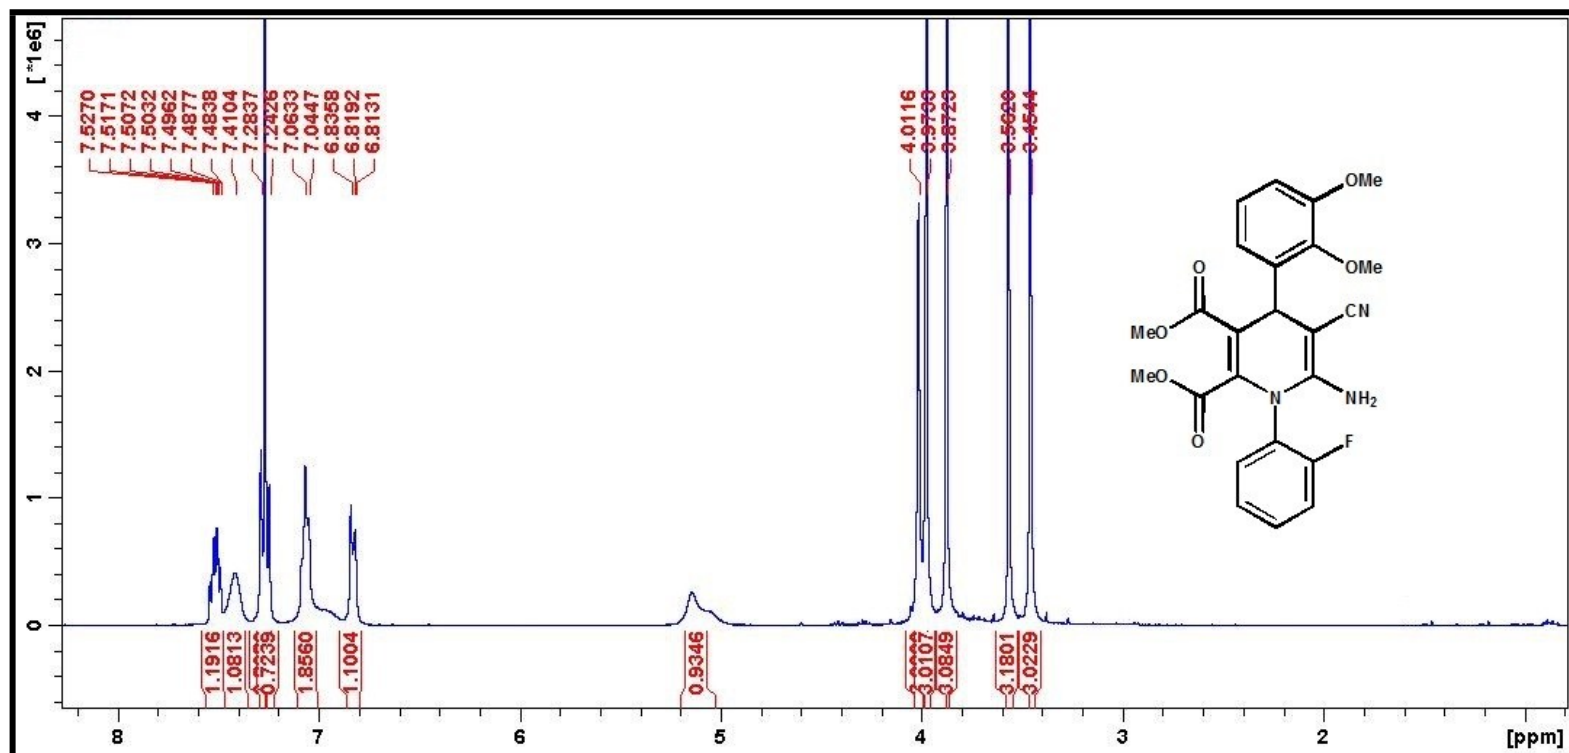

<sup>1</sup>H NMR spectra of **5d**

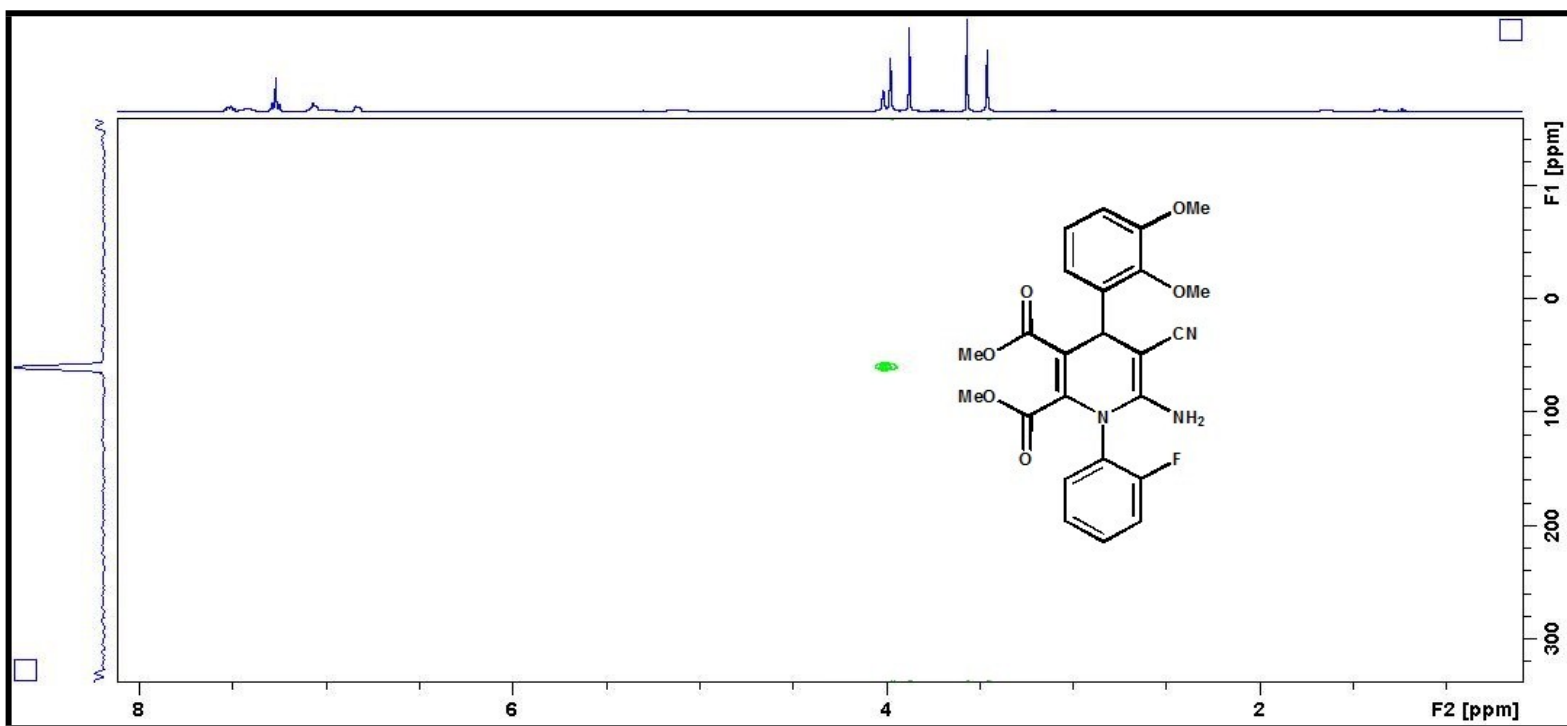

<sup>15</sup>N NMR spectra of **5d**

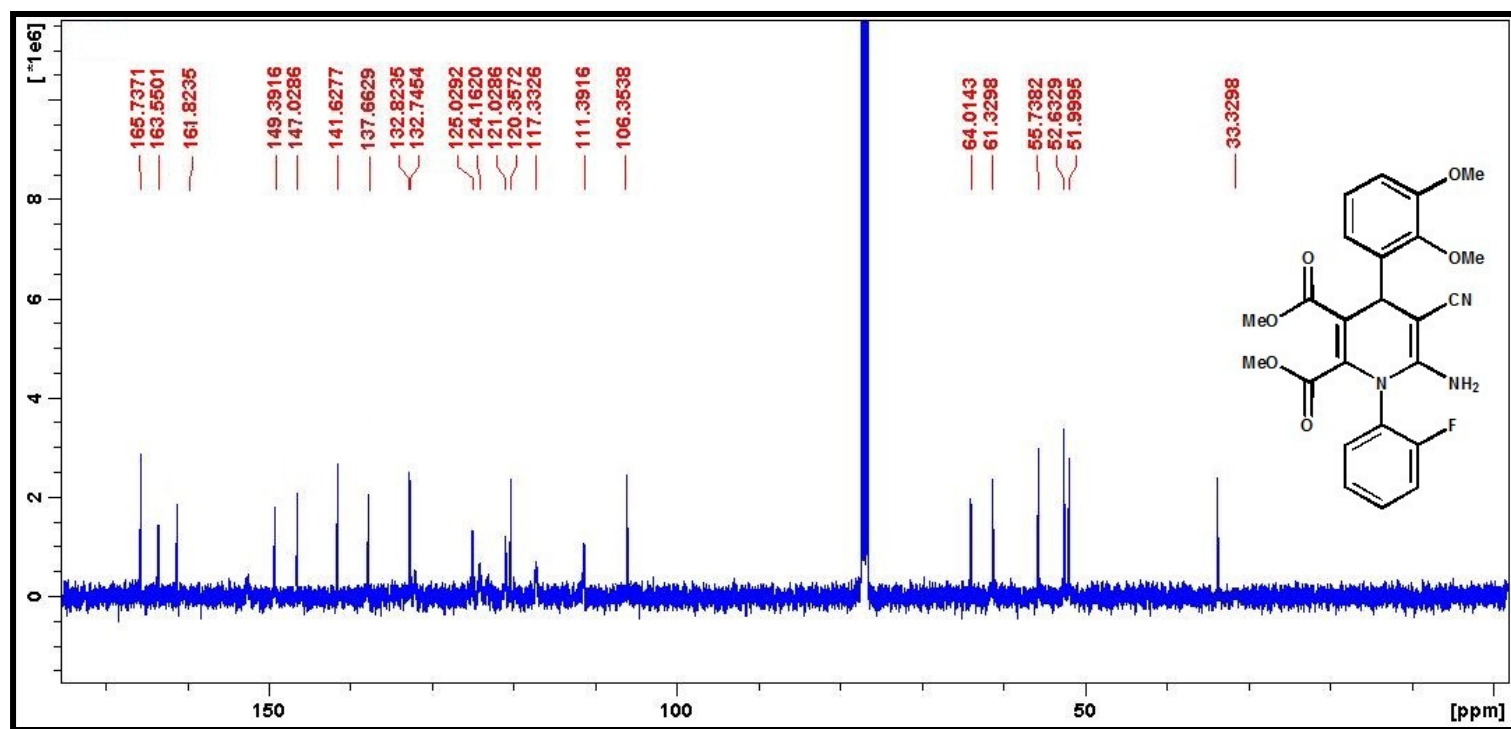

<sup>13</sup>C NMR spectra of 5d

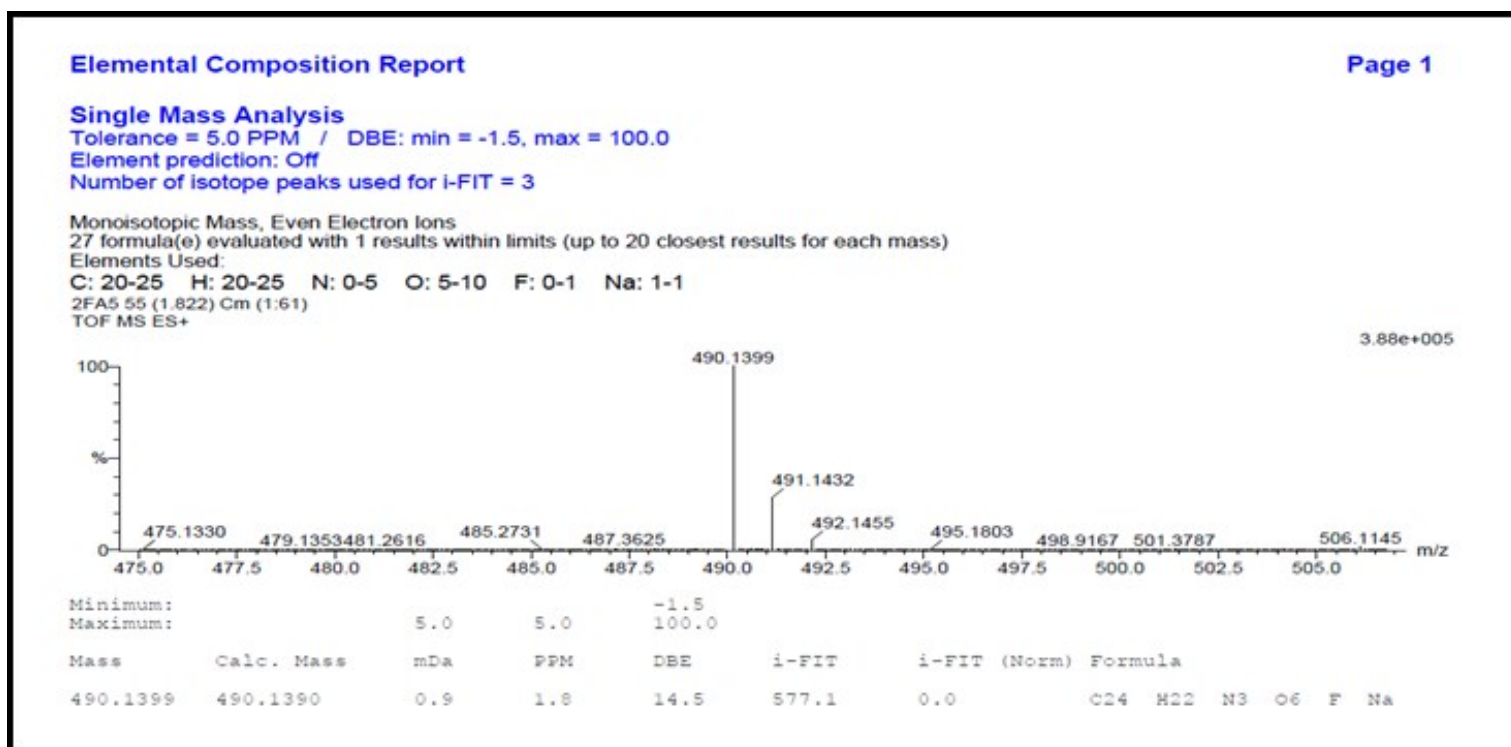

HRMS spectra of 5d

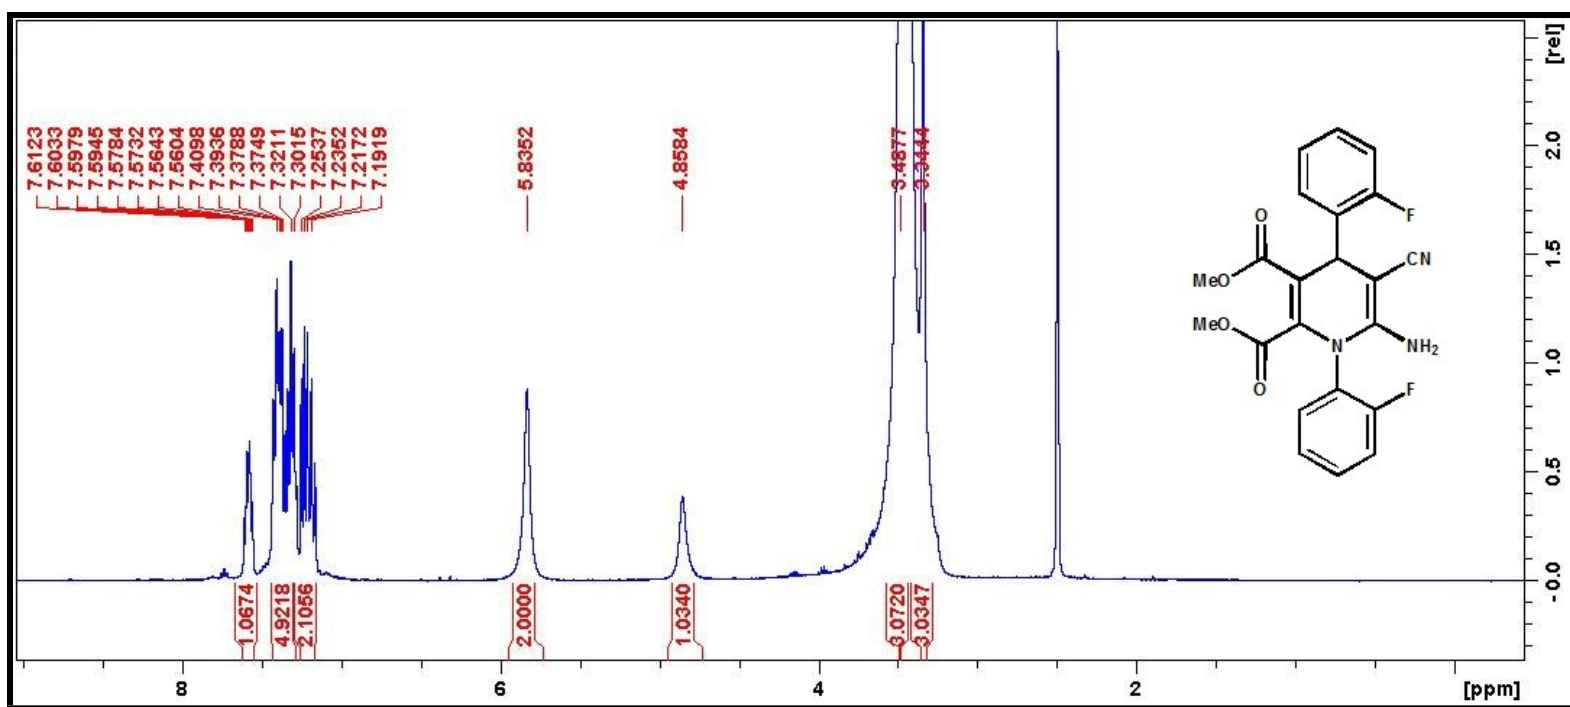

<sup>1</sup>H NMR spectra of **5e**

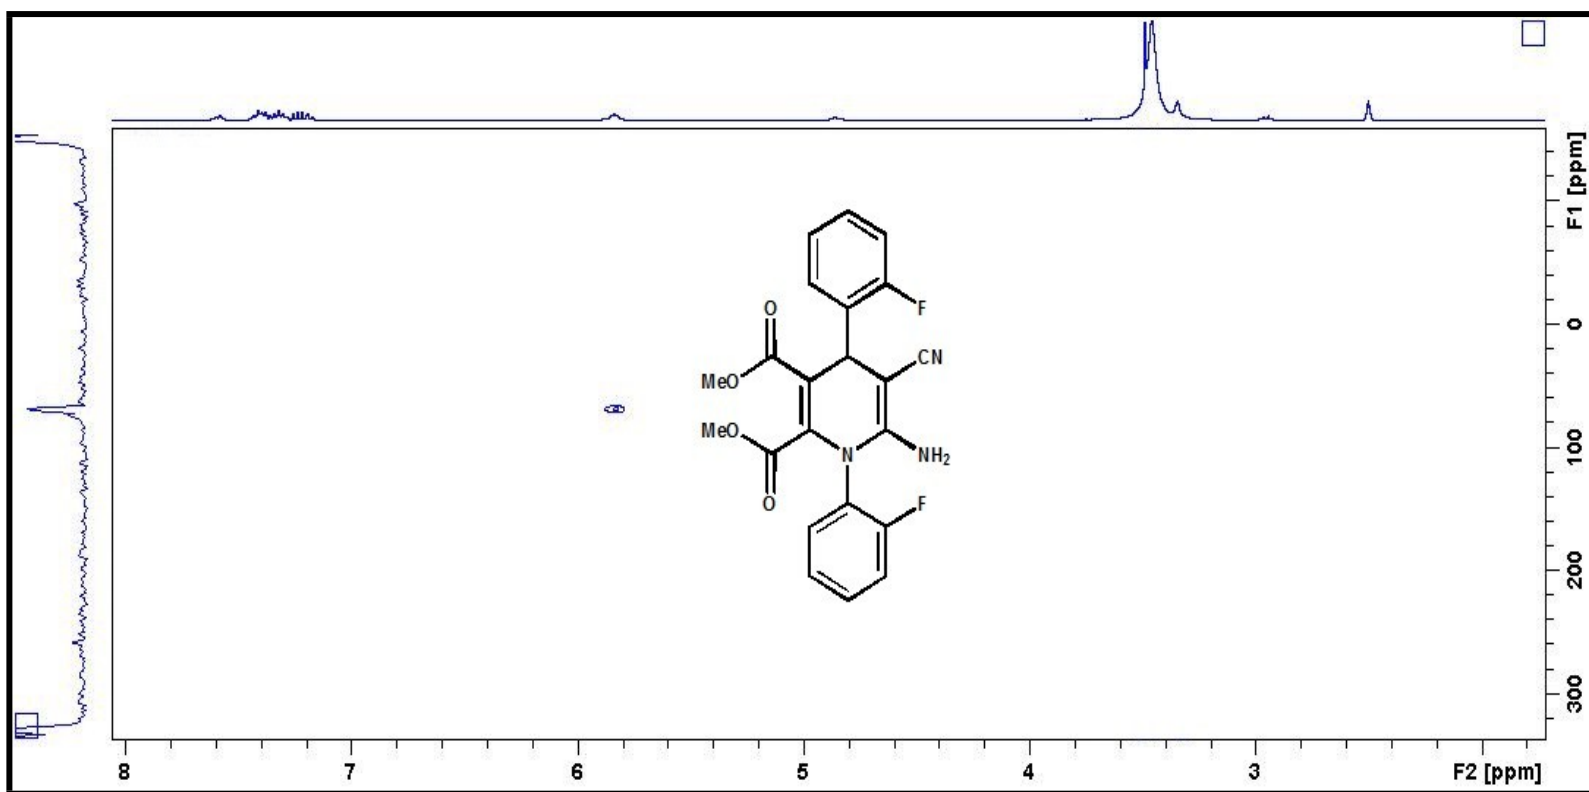

<sup>15</sup>N NMR spectra of **5e**

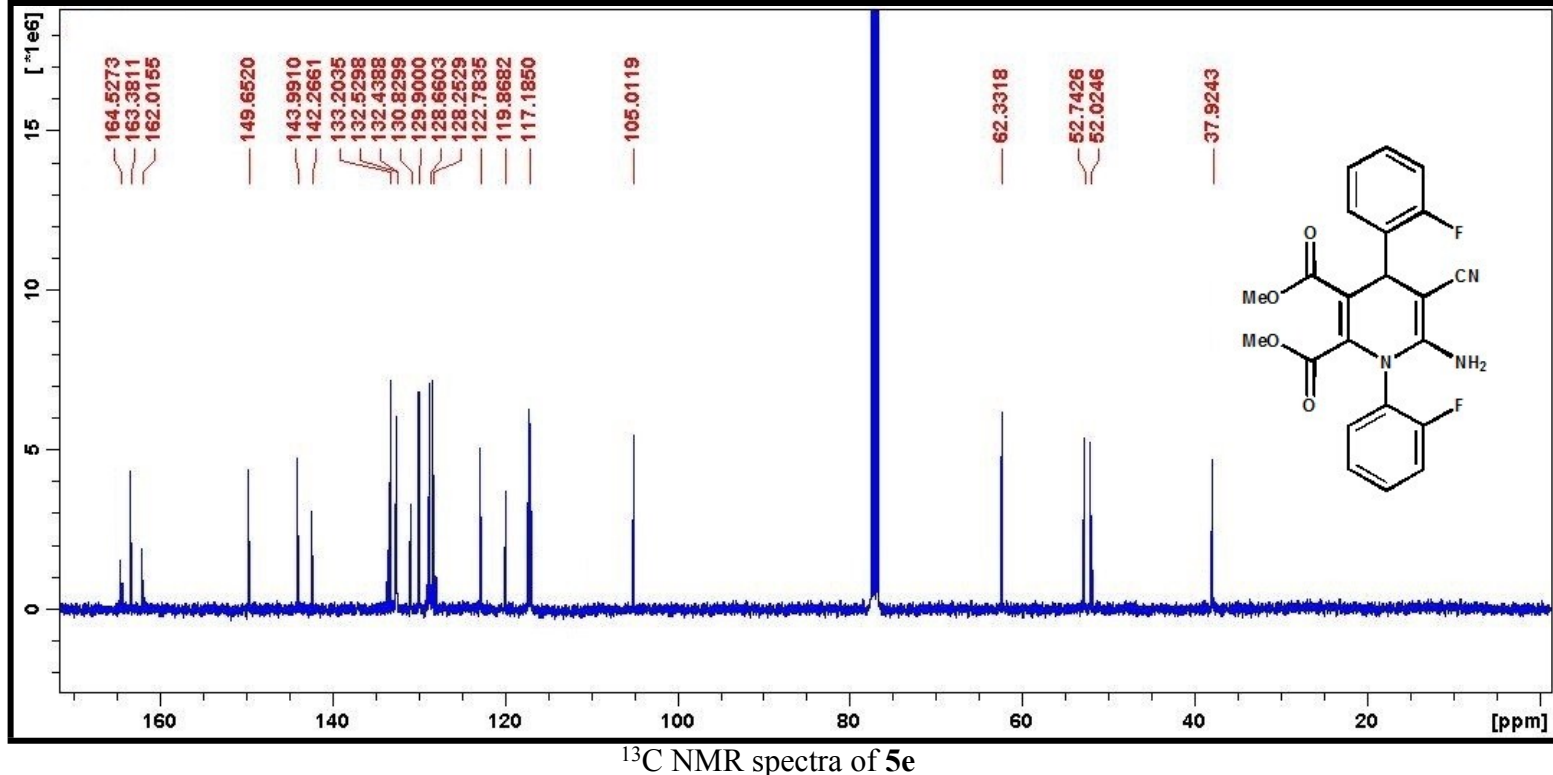

<sup>13</sup>C NMR spectra of 5e

HRMS spectra of 5e

## Elemental Composition Report

Page 1

### Single Mass Analysis

Tolerance = 5.0 PPM / DBE: min = -1.5, max = 100.0

Element prediction: Off

Number of isotope peaks used for i-FIT = 3

Monoisotopic Mass, Even Electron Ions

47 formula(e) evaluated with 1 results within limits (up to 20 closest results for each mass)

Elements Used:

C: 20-25 H: 15-25 N: 0-5 O: 0-10 F: 2-2 Na: 1-1

2FA17 61 (2.025) Cm (1:61)

TOF MS ES+

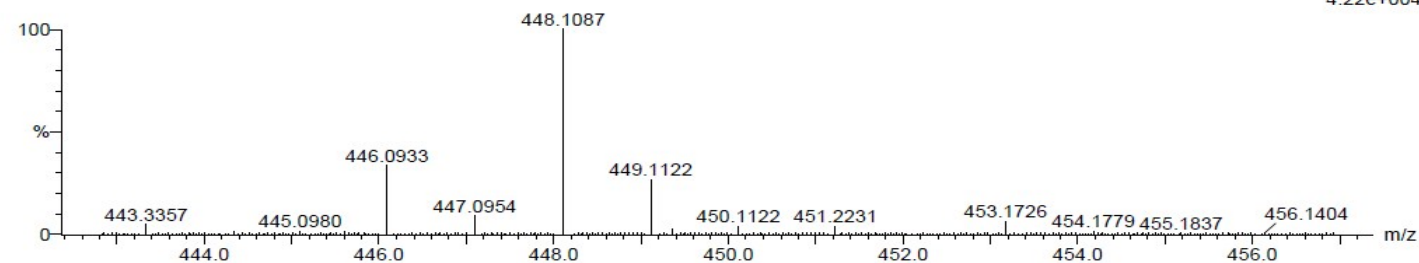

Minimum:

Maximum:

5.0 5.0 -1.5 100.0

| Mass | Calc. Mass | mDa | PPM | DBE | i-FIT | i-FIT (Norm) | Formula |
|------|------------|-----|-----|-----|-------|--------------|---------|
|------|------------|-----|-----|-----|-------|--------------|---------|

|          |          |     |     |      |       |     |                     |
|----------|----------|-----|-----|------|-------|-----|---------------------|
| 448.1087 | 448.1085 | 0.2 | 0.4 | 14.5 | 482.1 | 0.0 | C22 H17 N3 O4 F2 Na |
|----------|----------|-----|-----|------|-------|-----|---------------------|

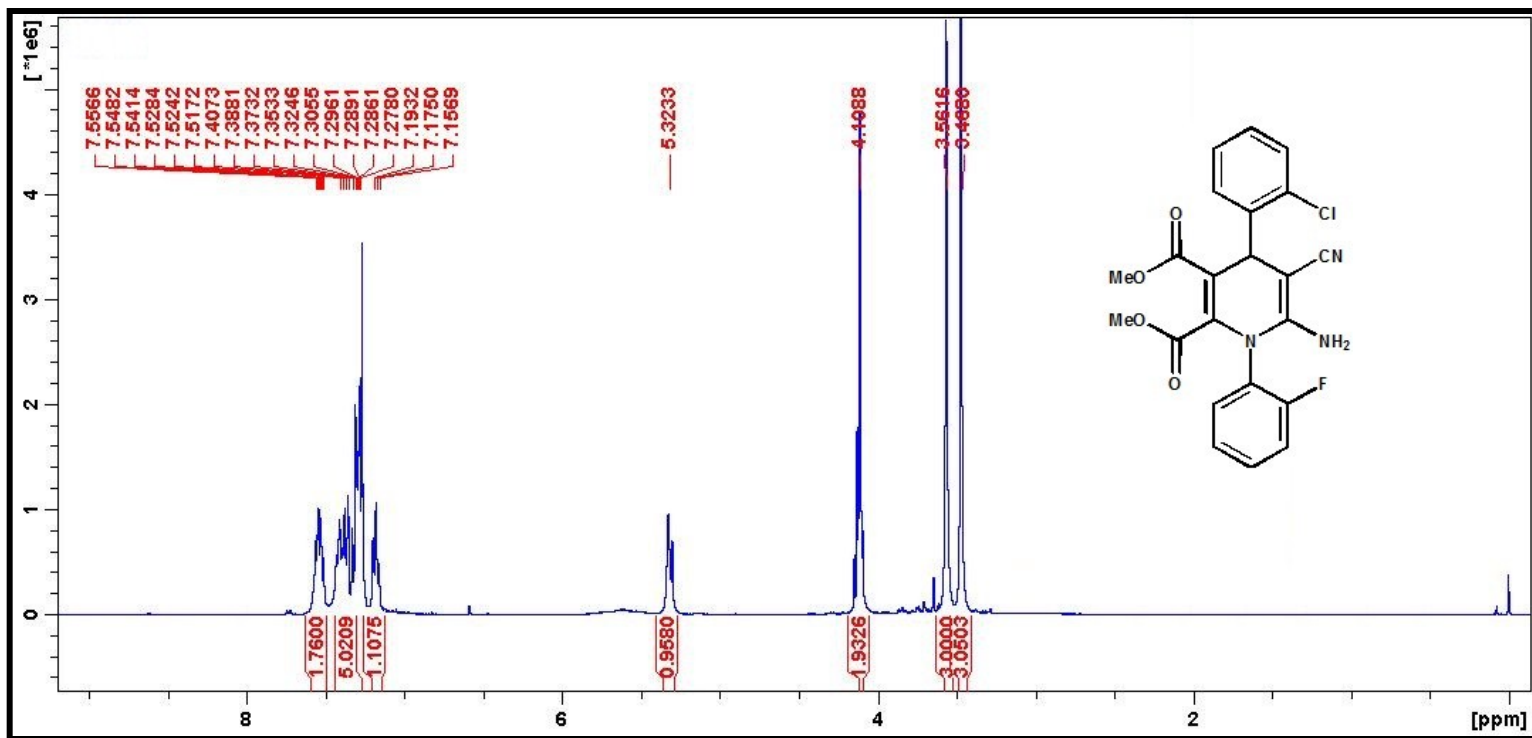

<sup>1</sup>H NMR spectra of **5f**

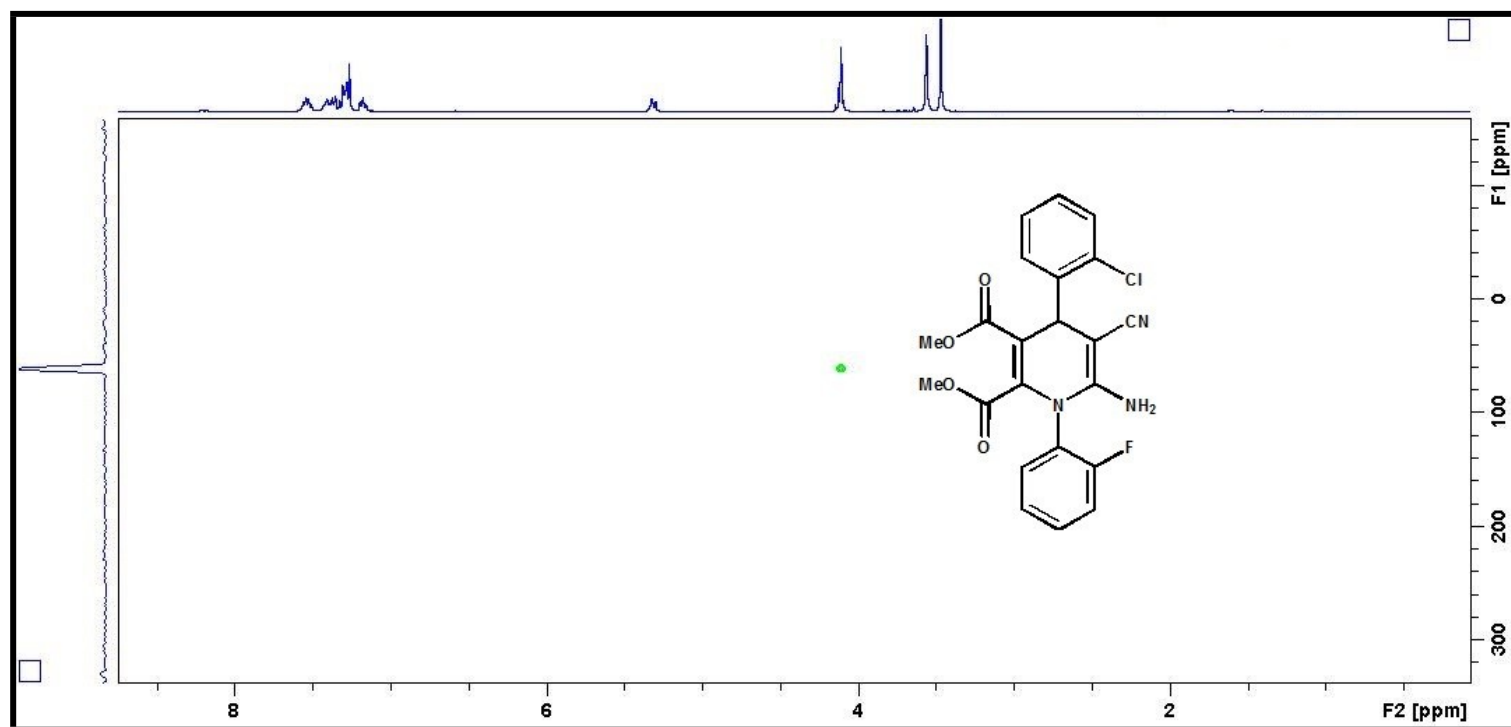

<sup>15</sup>N NMR spectra of **5f**

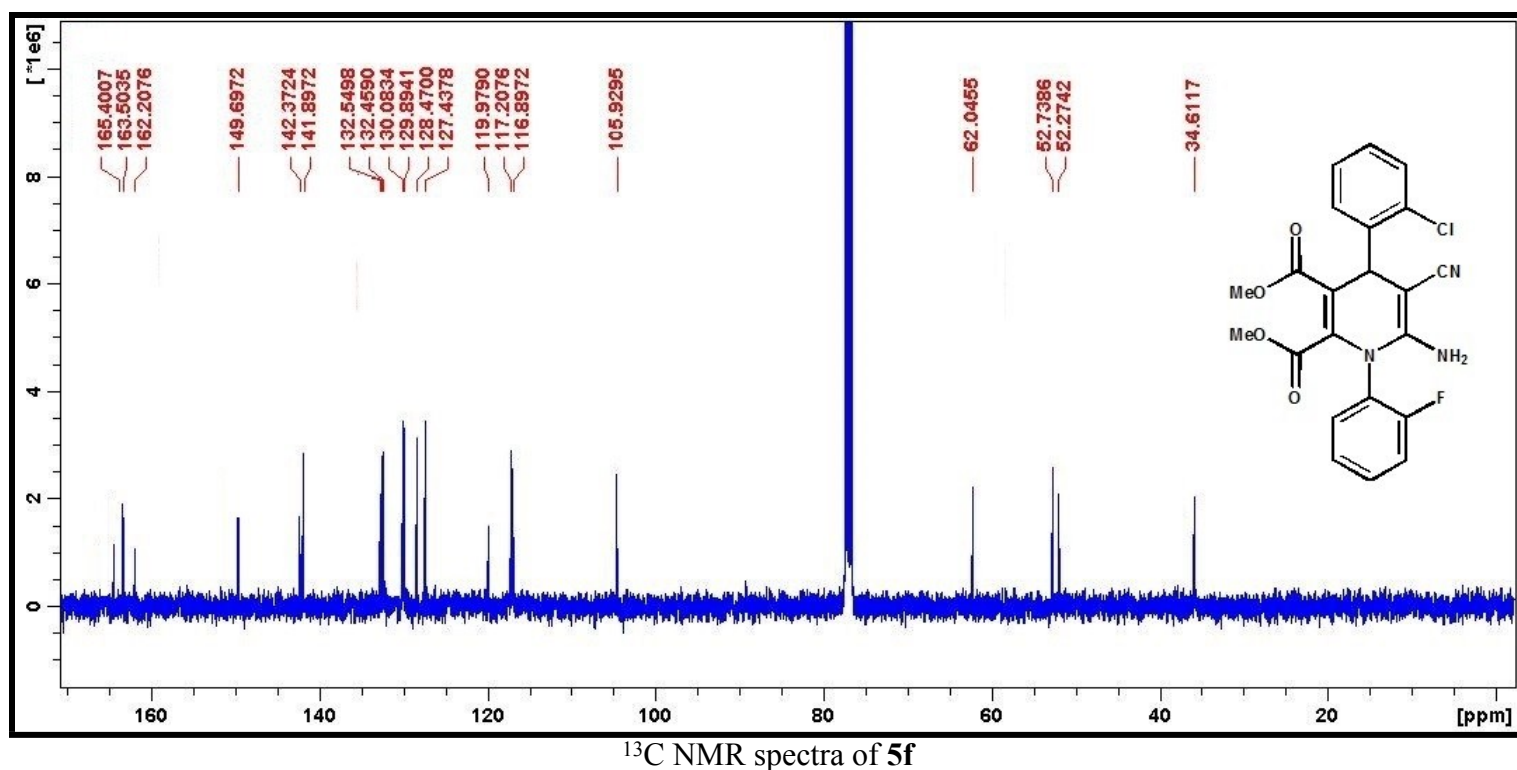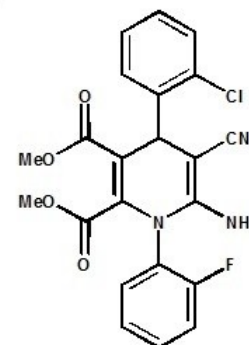

## Elemental Composition Report

Page 1

## Single Mass Analysis

Tolerance = 5.0 PPM / DBE: min = -1.5, max = 100.0

Element prediction: Off

Number of isotope peaks used for i-FIT = 3

### Monoisotopic Mass, Even Electron Ions

47 formula(e) evaluated with 1 results within limits (up to 20 closest results for each mass)

Elements Used:

C: 20-25 H: 15-25 N: 0-5 O: 0-10 F: 1-1 Na: 1-1 Cl: 1-1

2FA14 16 (0.507) Cm (1:61)

TOF MS ES+

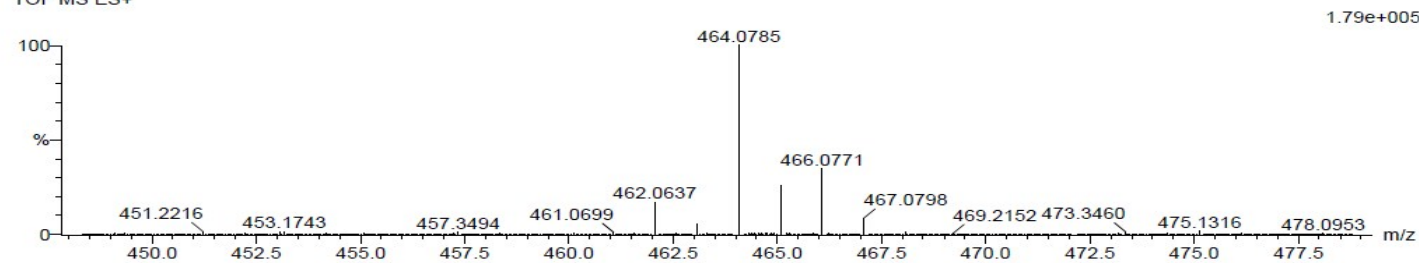

|          |            |      |      |       |       |              |         |     |    |    |   |    |    |  |  |  |  |  |  |  |
|----------|------------|------|------|-------|-------|--------------|---------|-----|----|----|---|----|----|--|--|--|--|--|--|--|
| Minimum: |            |      |      | -1.5  |       |              |         |     |    |    |   |    |    |  |  |  |  |  |  |  |
| Maximum: |            | 5.0  | 5.0  | 100.0 |       |              |         |     |    |    |   |    |    |  |  |  |  |  |  |  |
| Mass     | Calc. Mass | mDa  | PPM  | DBE   | i-FIT | i-FIT (Norm) | Formula |     |    |    |   |    |    |  |  |  |  |  |  |  |
| 464.0785 | 464.0789   | -0.4 | -0.9 | 14.5  | 527.9 | 0.0          | C22     | H17 | N3 | O4 | F | Na | Cl |  |  |  |  |  |  |  |

HRMS spectra of **5f**



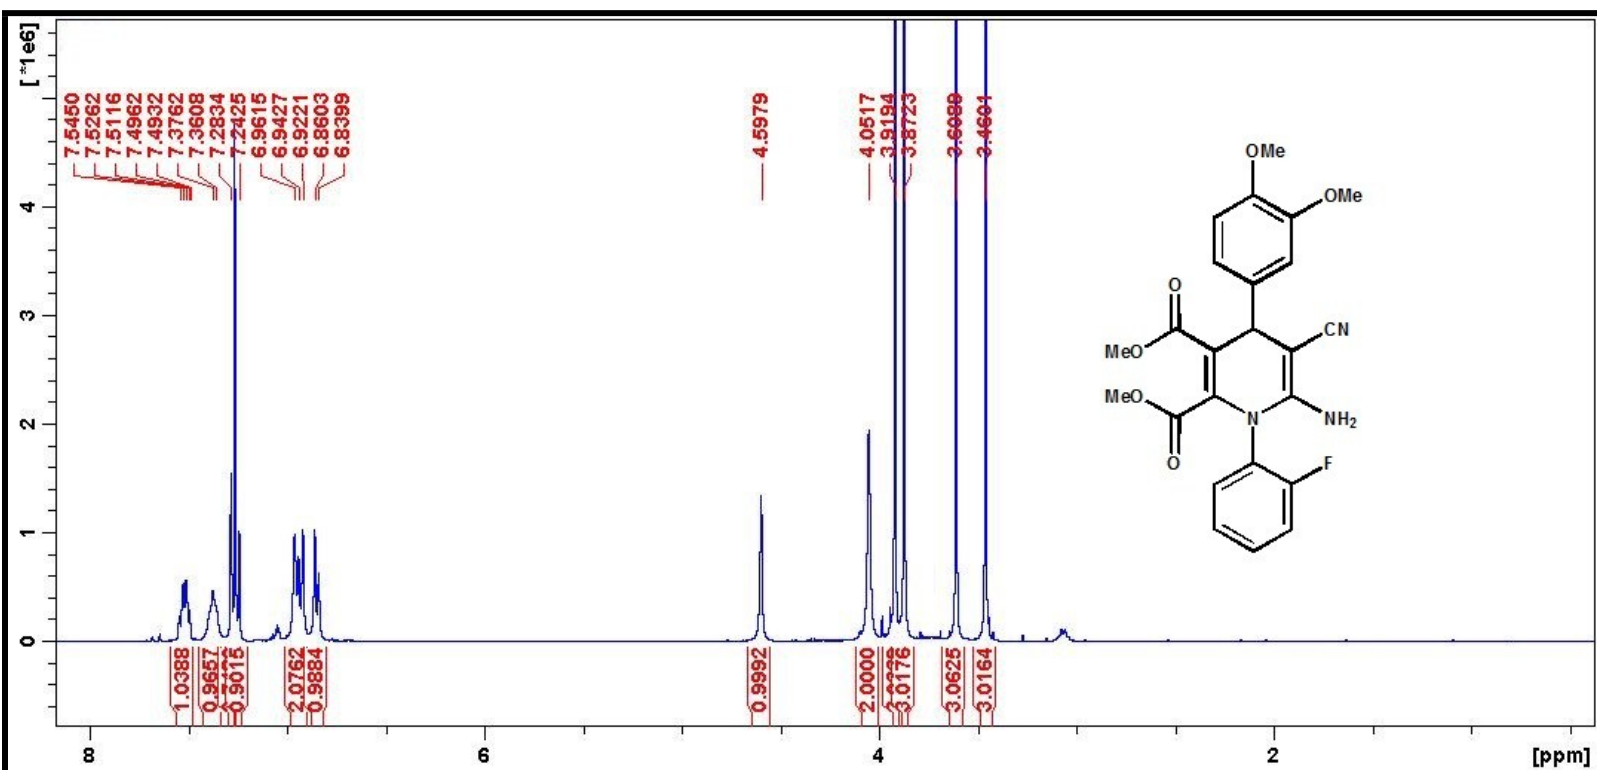

<sup>1</sup>H NMR spectra of **5g**

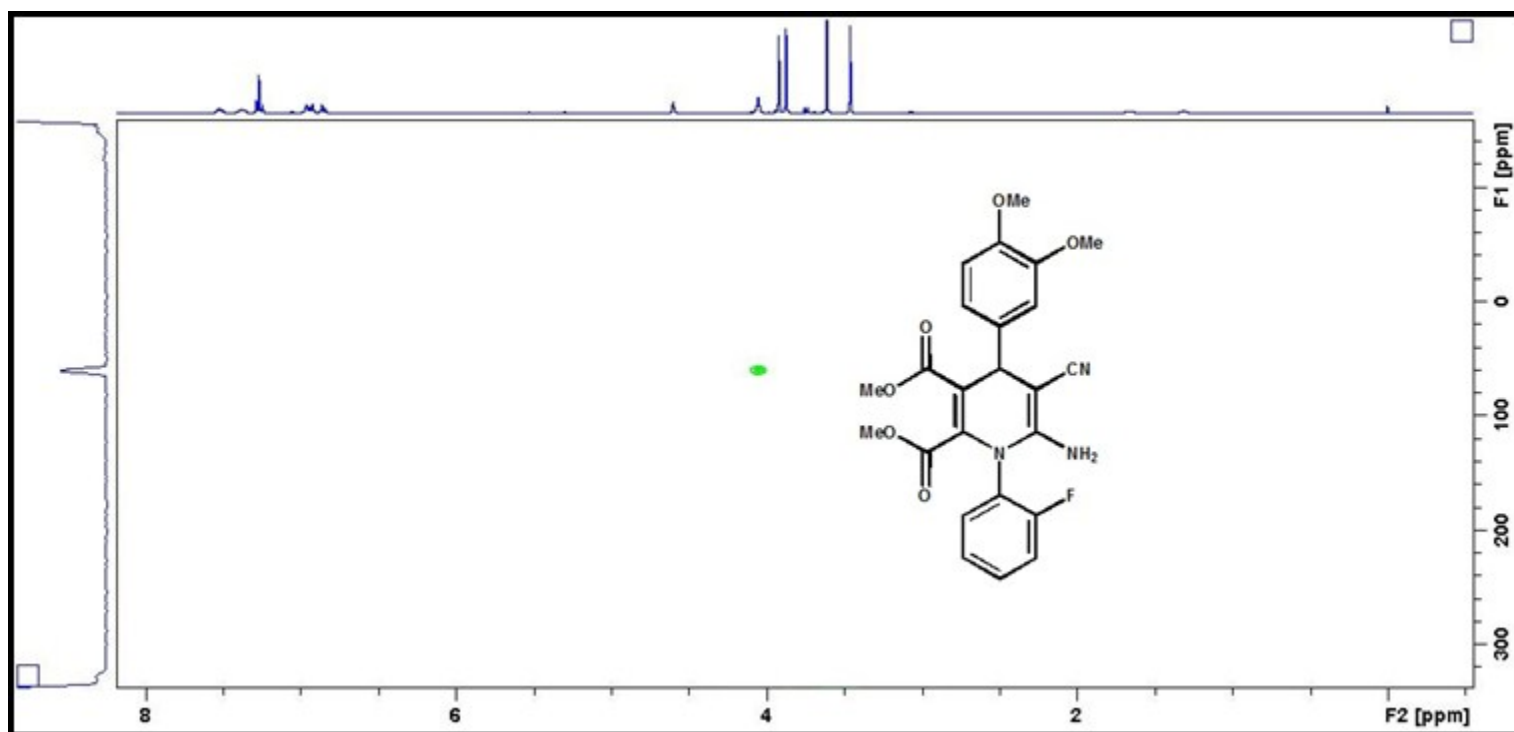

<sup>15</sup>N NMR spectra of **5g**



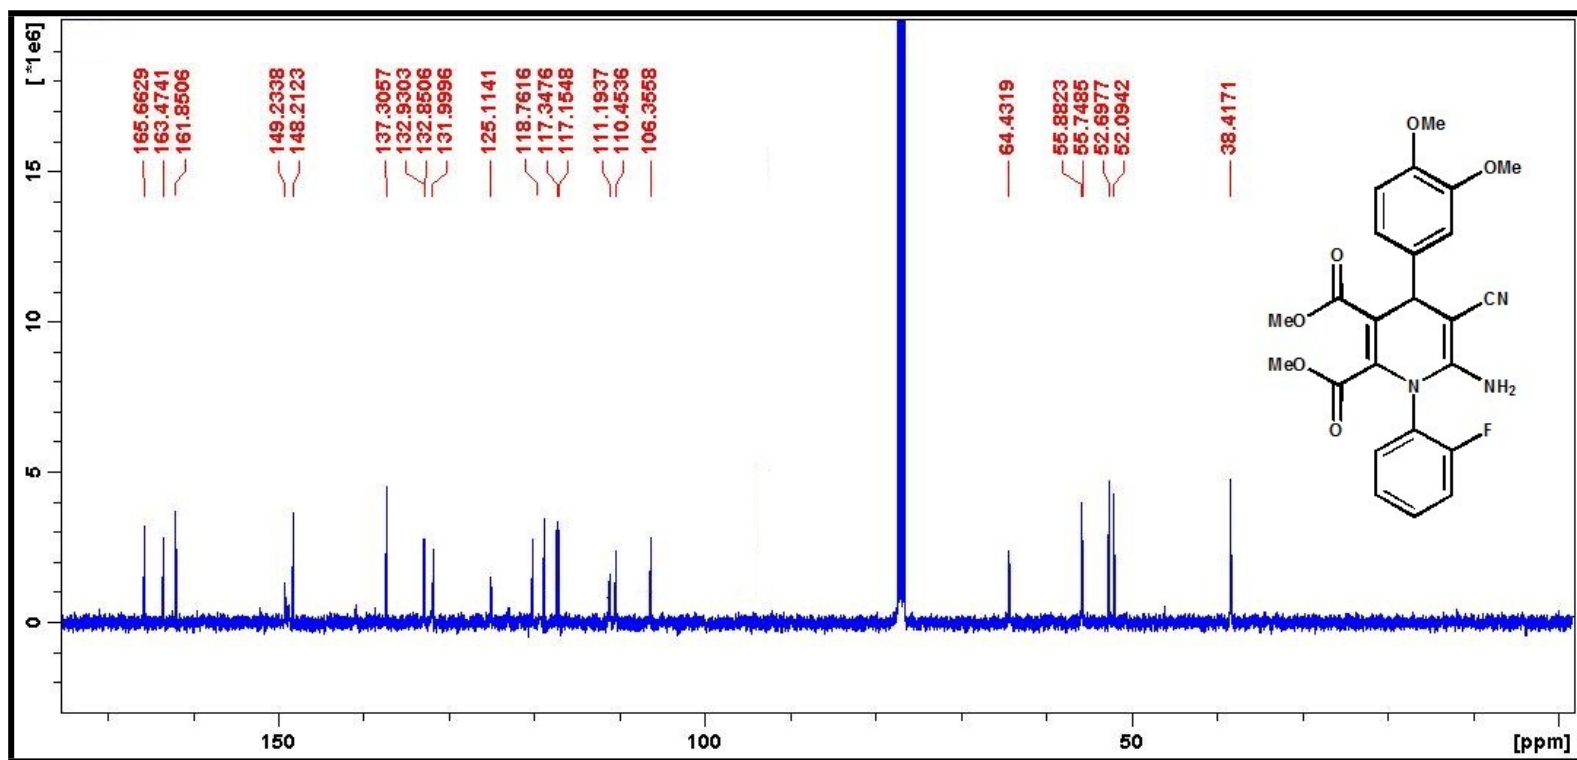

<sup>13</sup>C NMR spectra of **5g**

## Elemental Composition Report

Page 1

### Single Mass Analysis

Tolerance = 5.0 PPM / DBE: min = -1.5, max = 100.0

Element prediction: Off

Number of isotope peaks used for i-FIT = 3

Monoisotopic Mass, Even Electron Ions

27 formula(e) evaluated with 1 results within limits (up to 20 closest results for each mass)

Elements Used:

C: 20-25 H: 20-25 N: 0-5 O: 5-10 F: 0-1 Na: 1-1

2FA3 6 (0.169)

TOF MS ES+

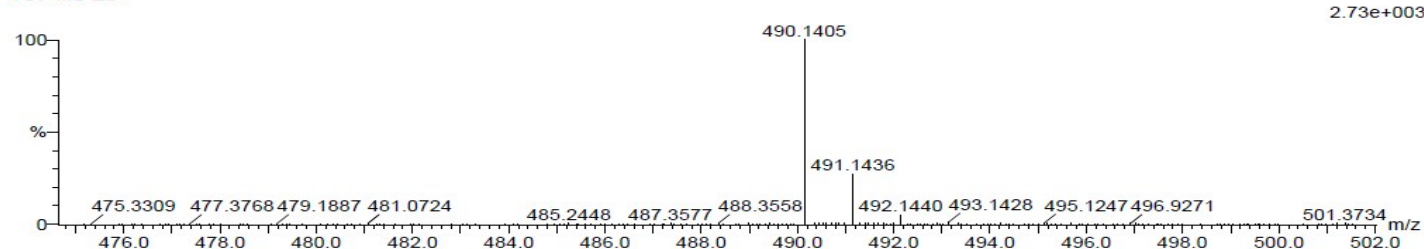

Minimum:

Maximum:

5.0

5.0

-1.5

100.0

Mass

Calc. Mass

mDa

PPM

DBE

i-FIT

i-FIT (Norm)

Formula

490.1405

490.1390

1.5

3.1

14.5

97.7

0.0

C24 H22 N3 O6 F Na

HRMS spectra of **5g**

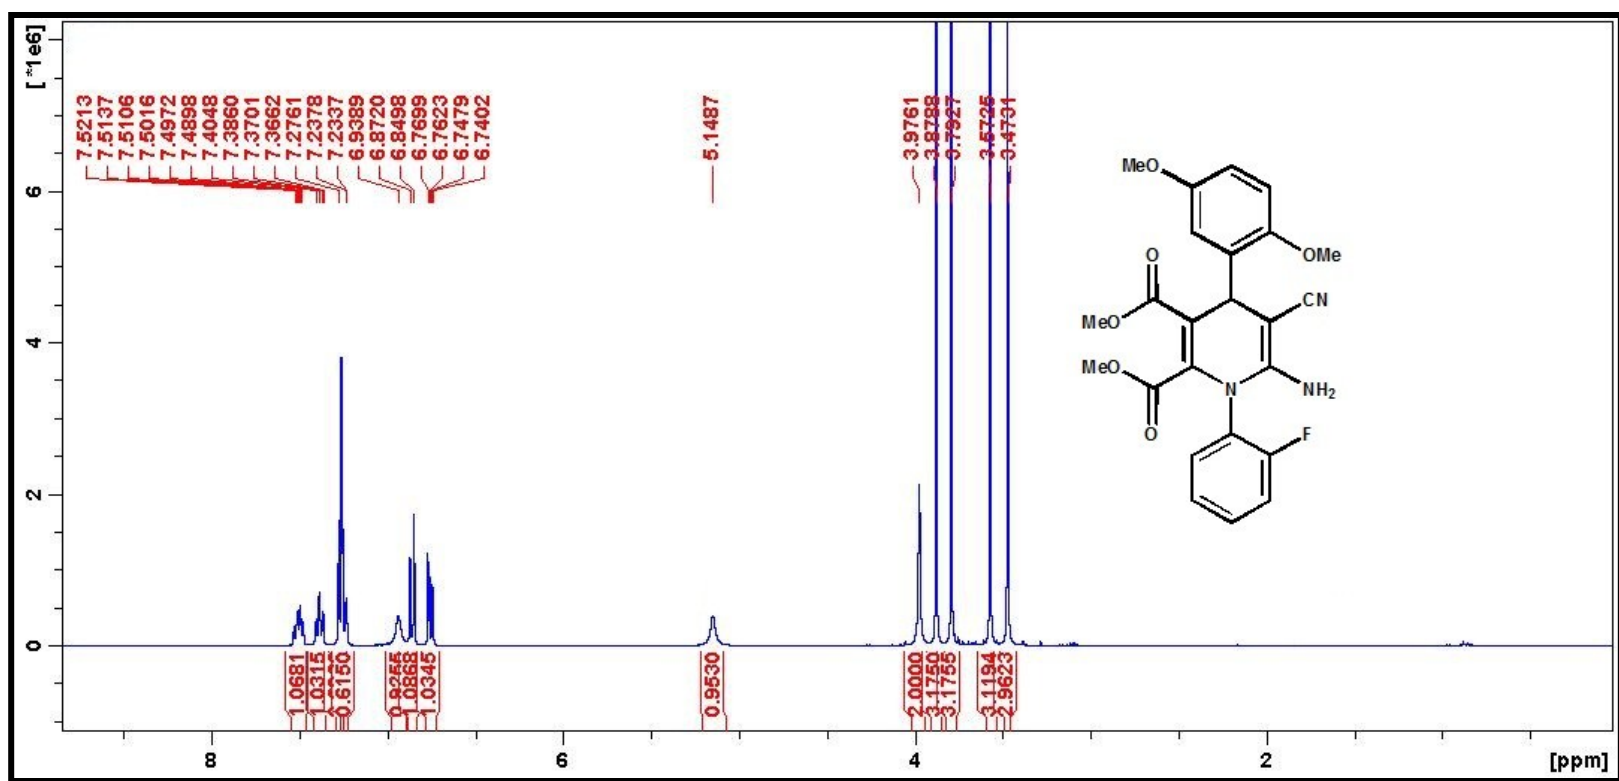

<sup>1</sup>H NMR spectra of **5h**

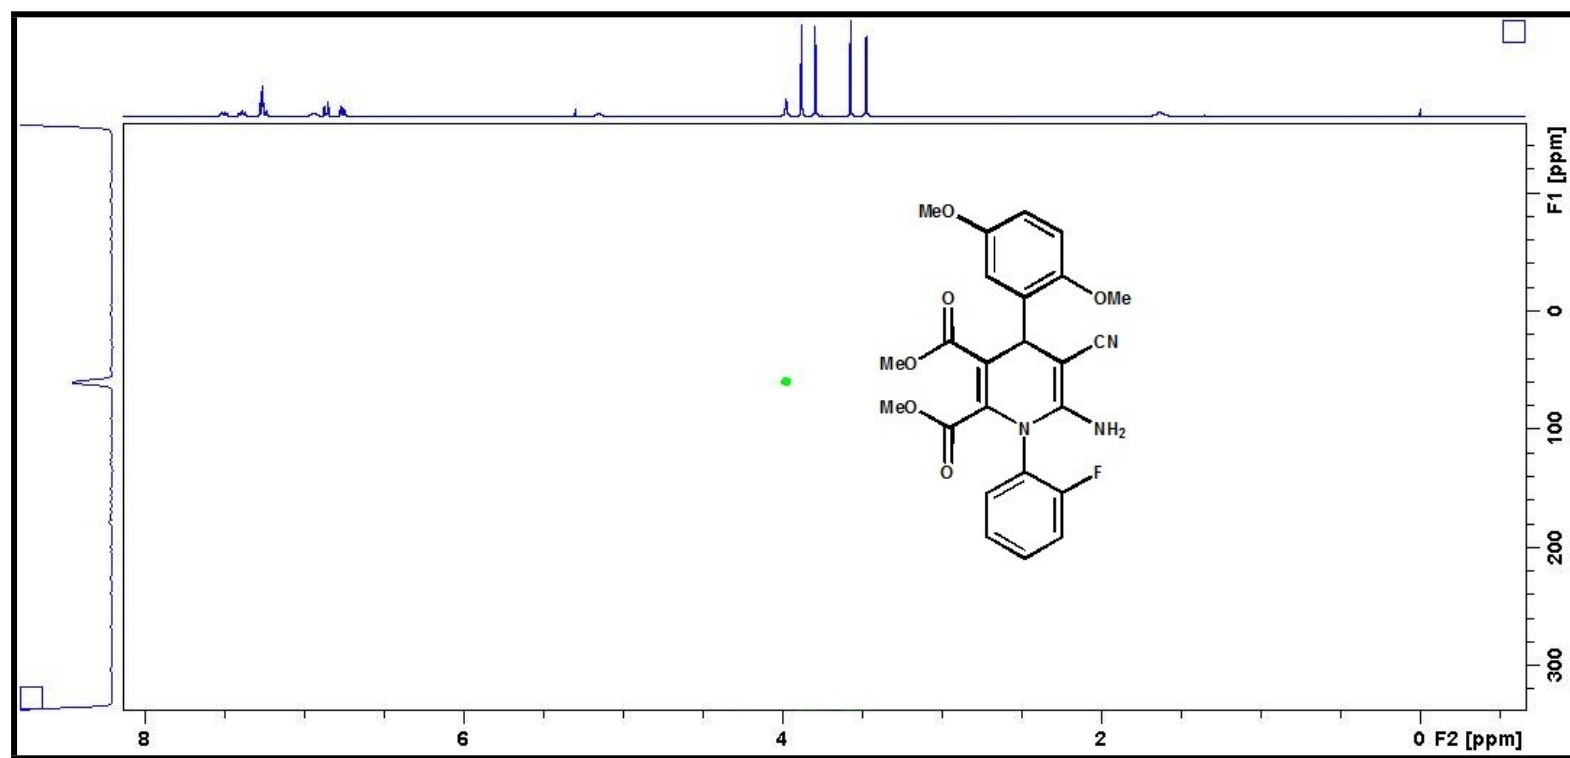

<sup>15</sup>N NMR spectra of **5h**

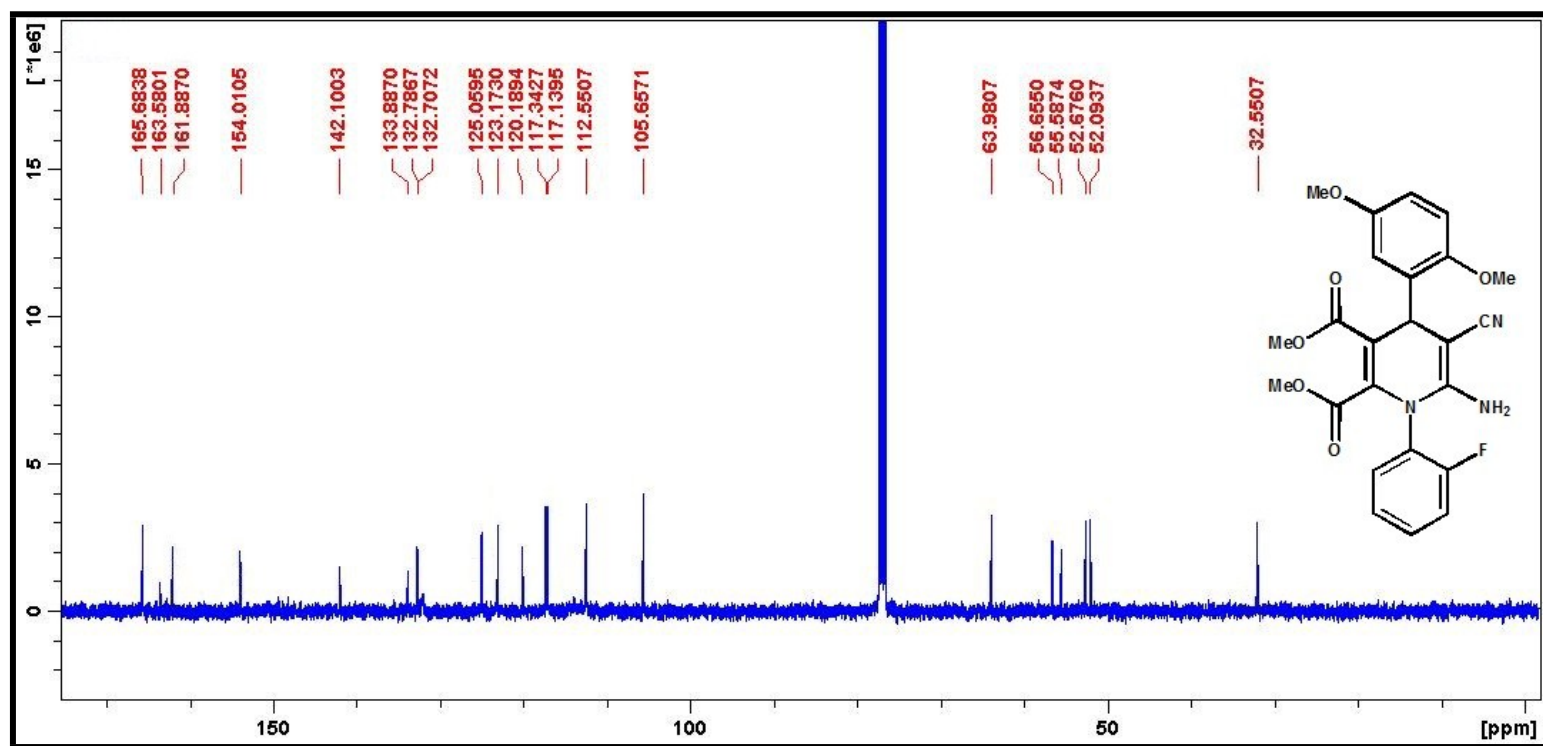

<sup>13</sup>C NMR spectra of **5h**

## Elemental Composition Report

Page 1

### Single Mass Analysis

Tolerance = 5.0 PPM / DBE: min = -1.5, max = 100.0

Element prediction: Off

Number of isotope peaks used for i-FIT = 3

Monoisotopic Mass, Even Electron Ions

45 formula(e) evaluated with 1 results within limits (up to 20 closest results for each mass)

Elements Used:

C: 20-25 H: 15-25 N: 0-5 O: 0-10 F: 1-1

F5 23 (0.742) Cm (1.61)

TOF MS ES+

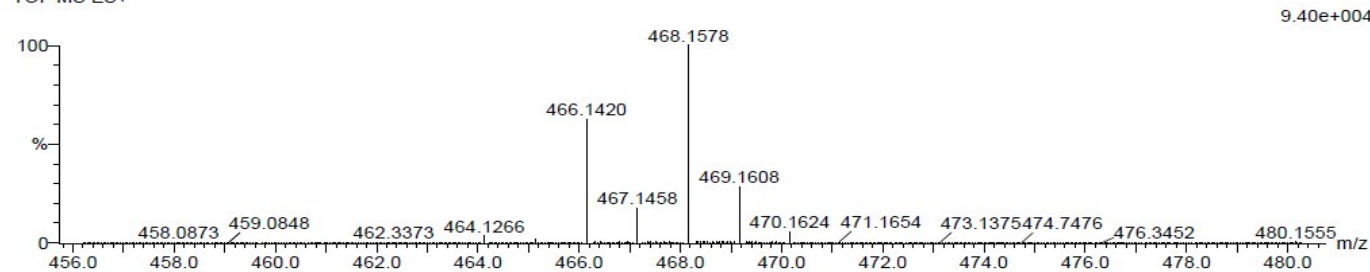

Minimum:

Maximum:

5.0

5.0

-1.5

100.0

| Mass     | Calc. Mass | mDa | PPM | DBE  | i-FIT | i-FIT (Norm) | Formula         |
|----------|------------|-----|-----|------|-------|--------------|-----------------|
| 468.1578 | 468.1571   | 0.7 | 1.5 | 14.5 | 499.7 | 0.0          | C24 H23 N3 O6 F |

HRMS spectra of **5h**

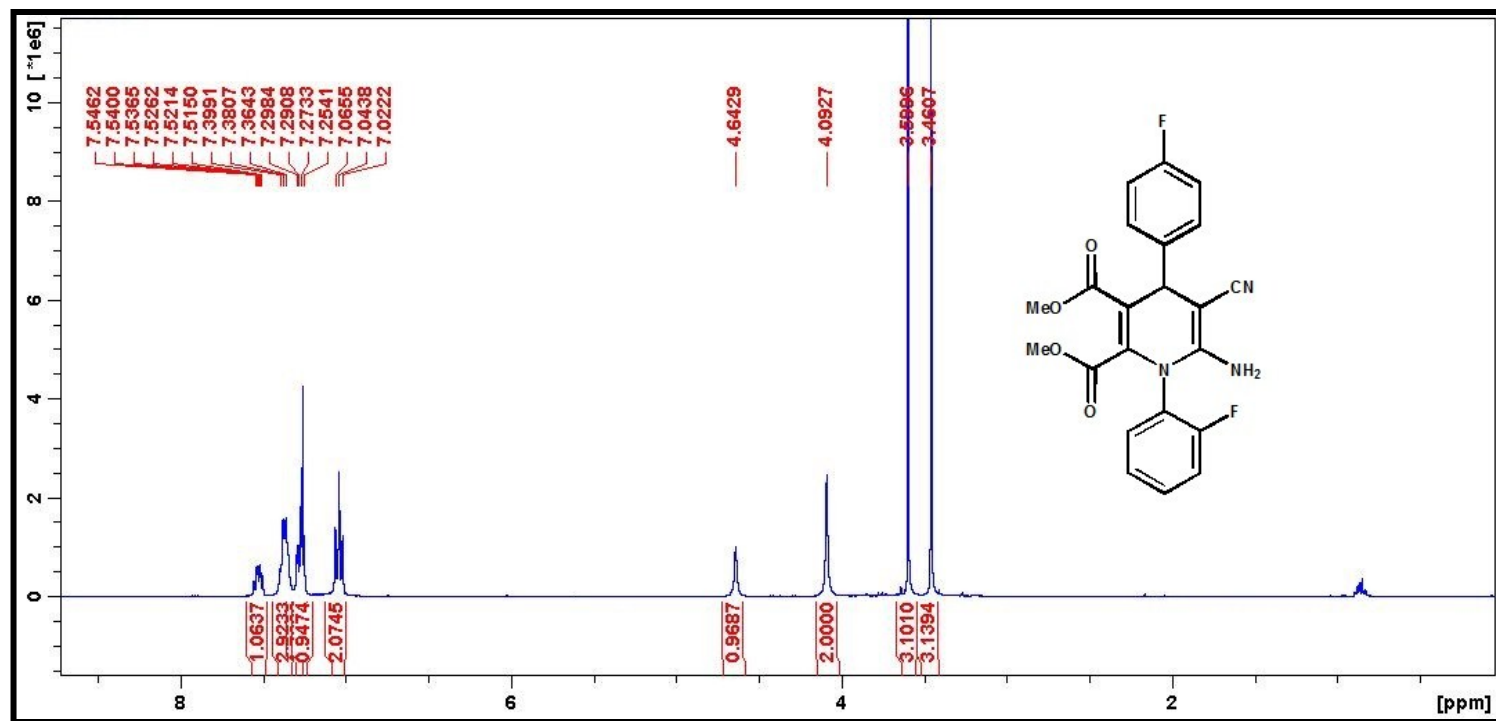

<sup>1</sup>H NMR spectra of **5i**

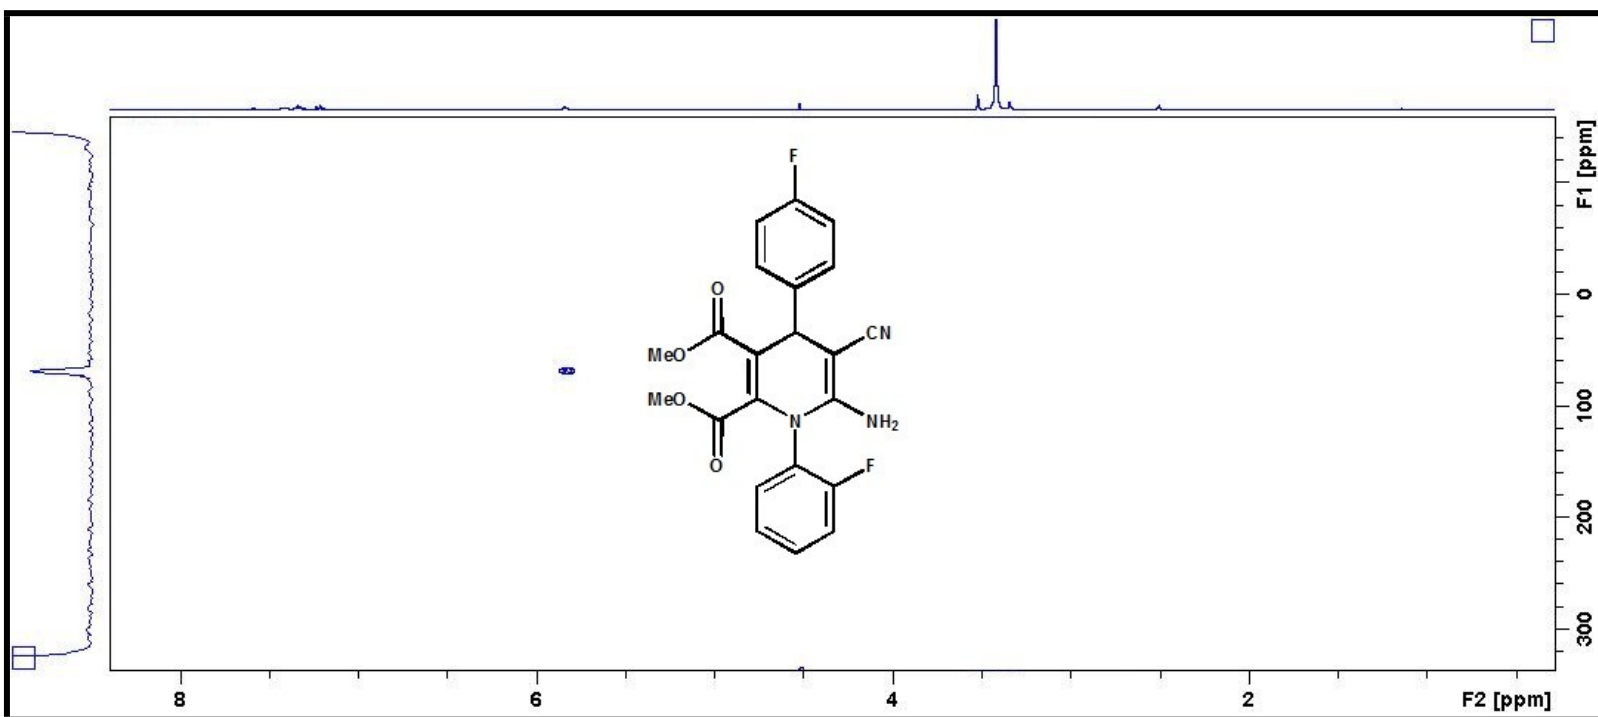

<sup>15</sup>N NMR spectra of **5i**

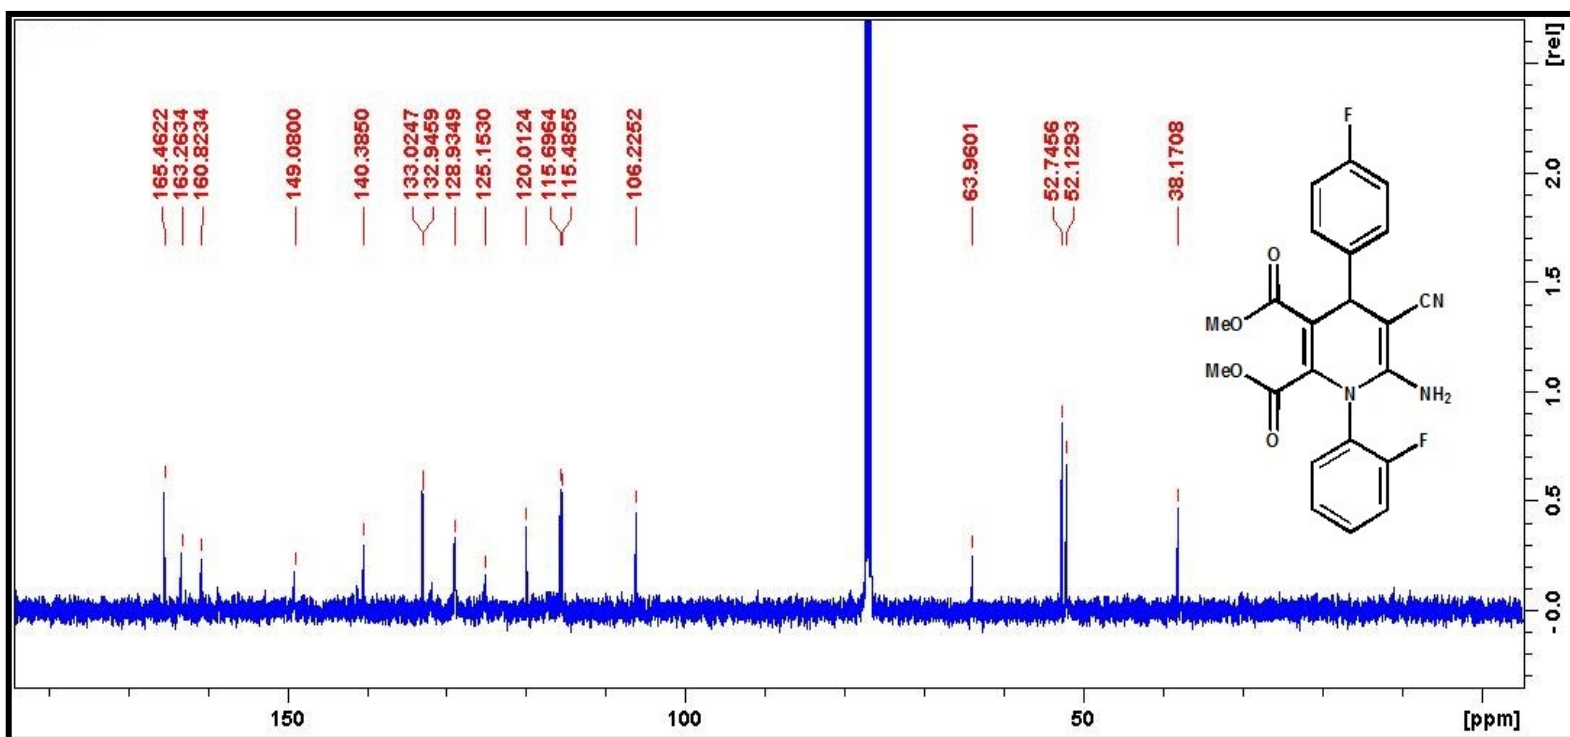

<sup>13</sup>C NMR spectra of **5i**

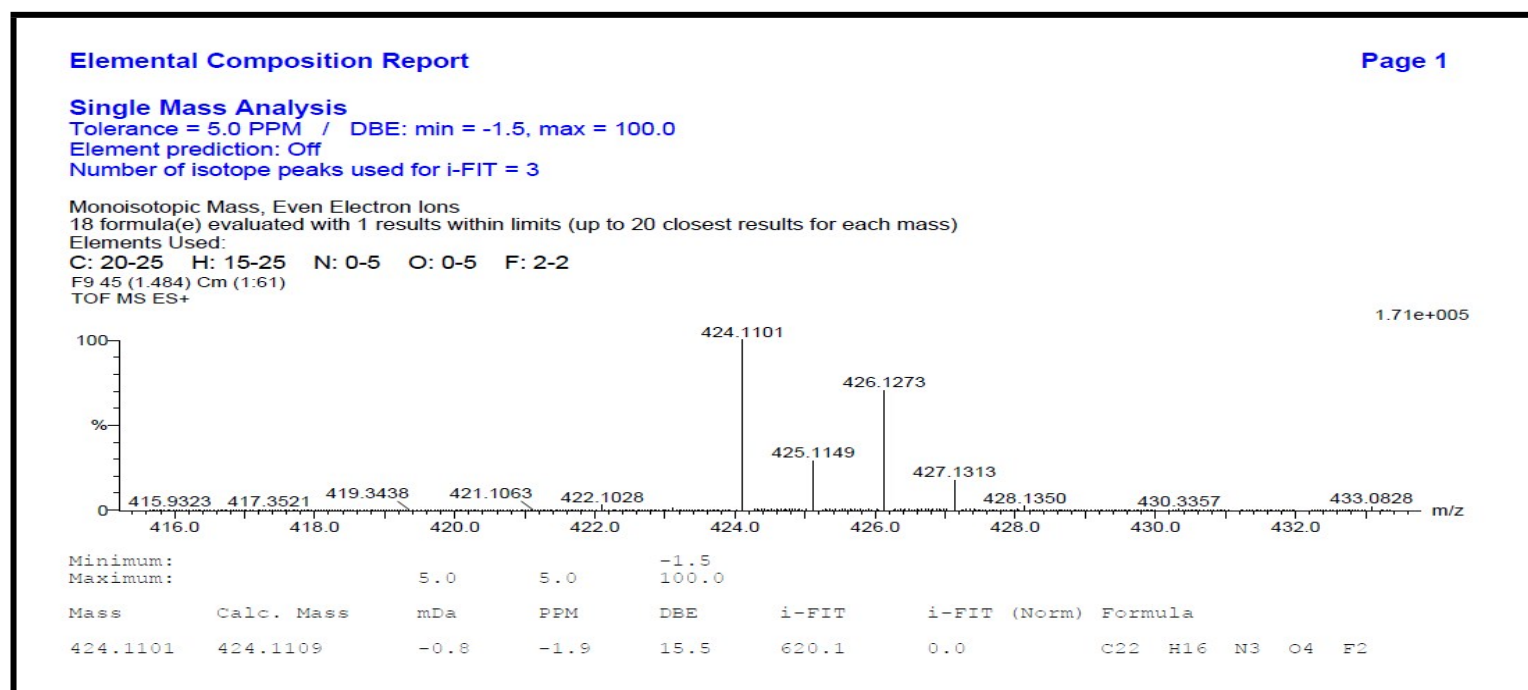

HRMS spectra of **5i**

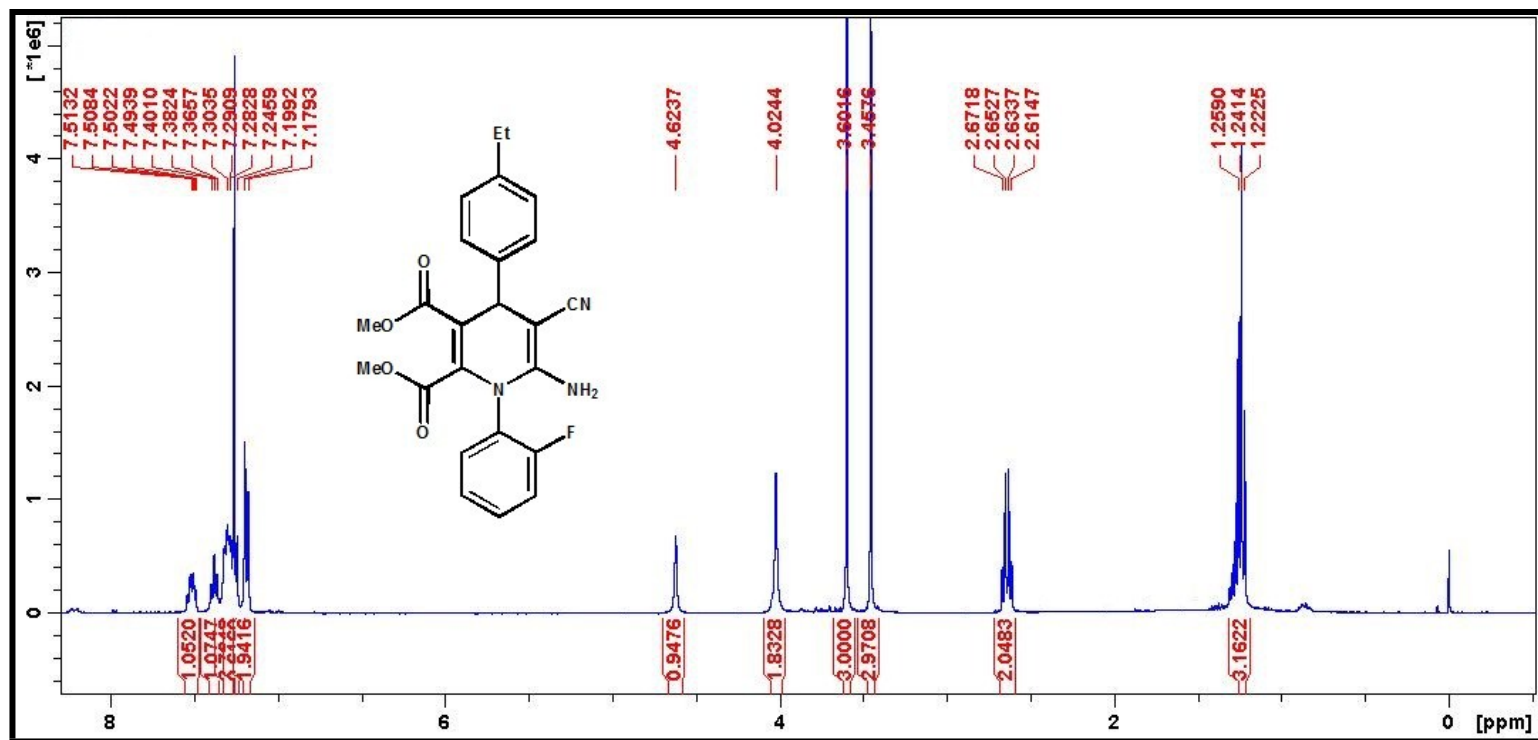

<sup>1</sup>H NMR spectra of **5j**

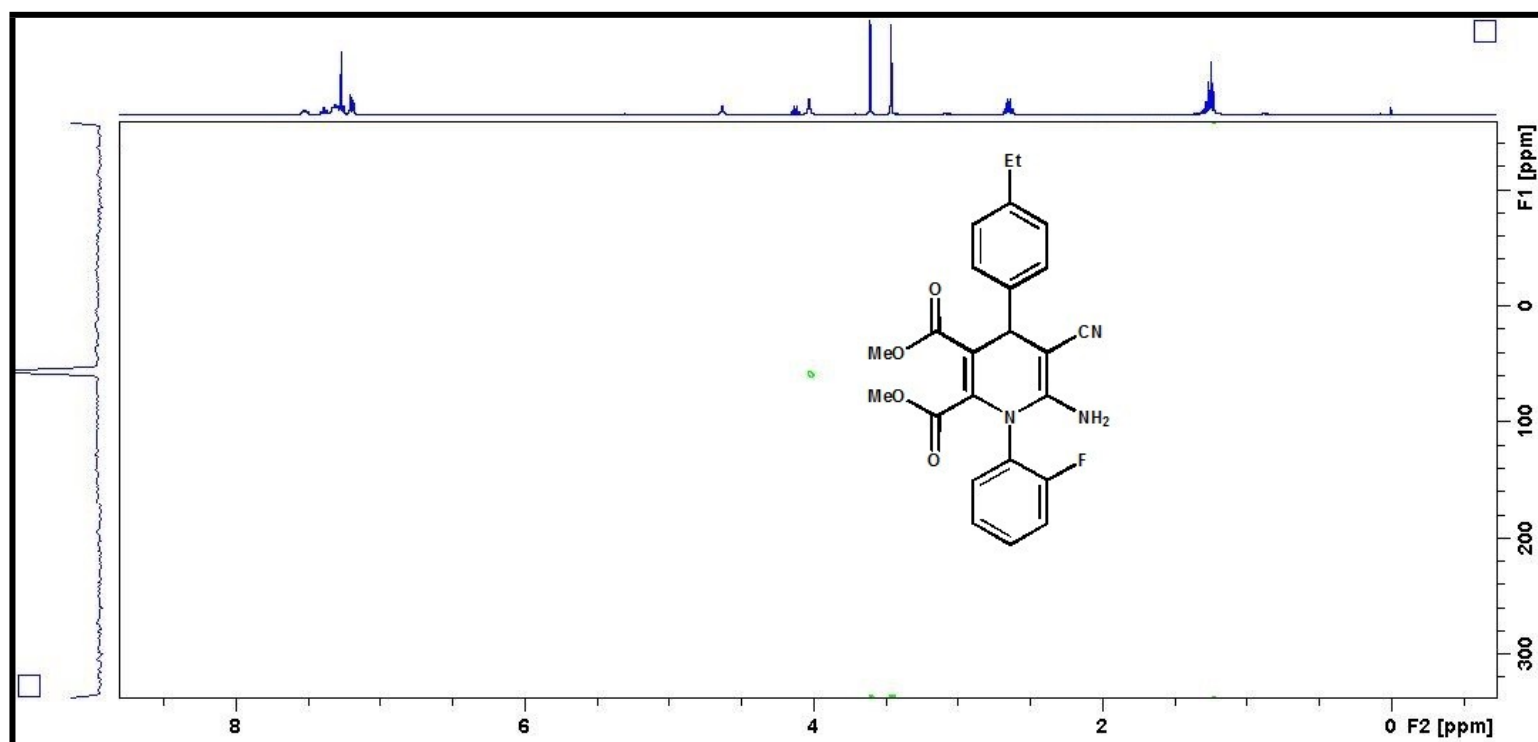

<sup>15</sup>N NMR spectra of **5j**



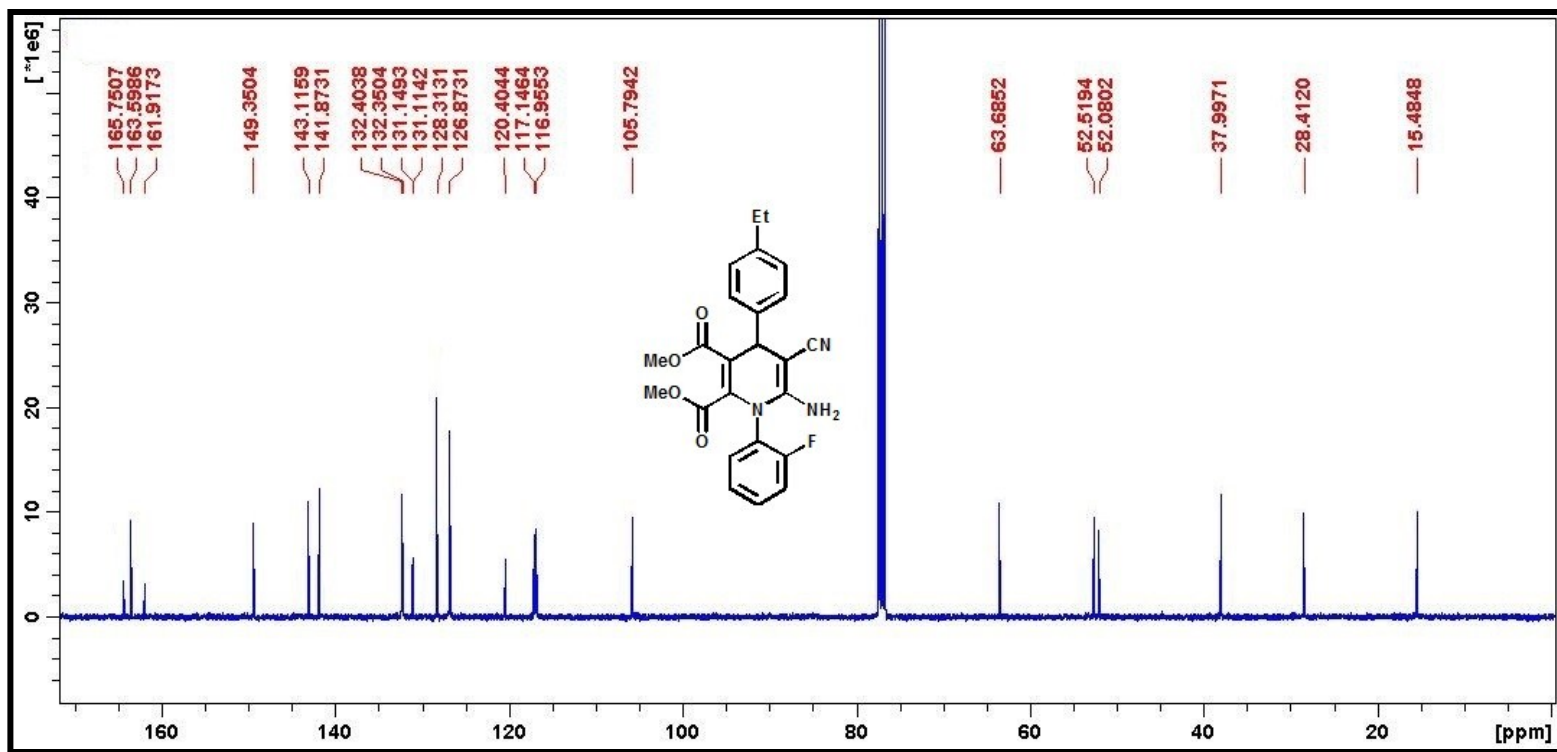

<sup>13</sup>C NMR spectra of **5j**

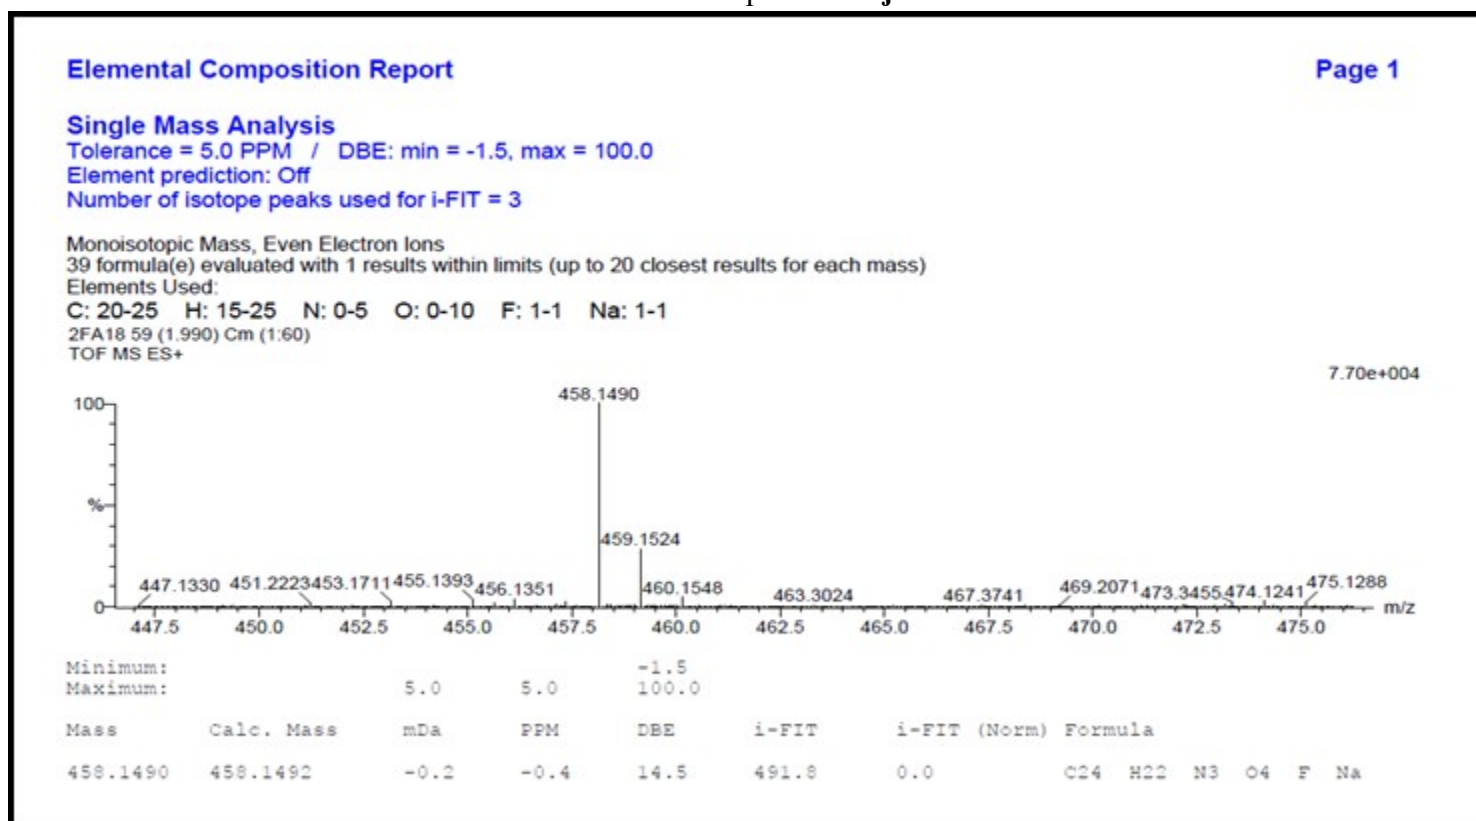

HRMS spectra of **5j**



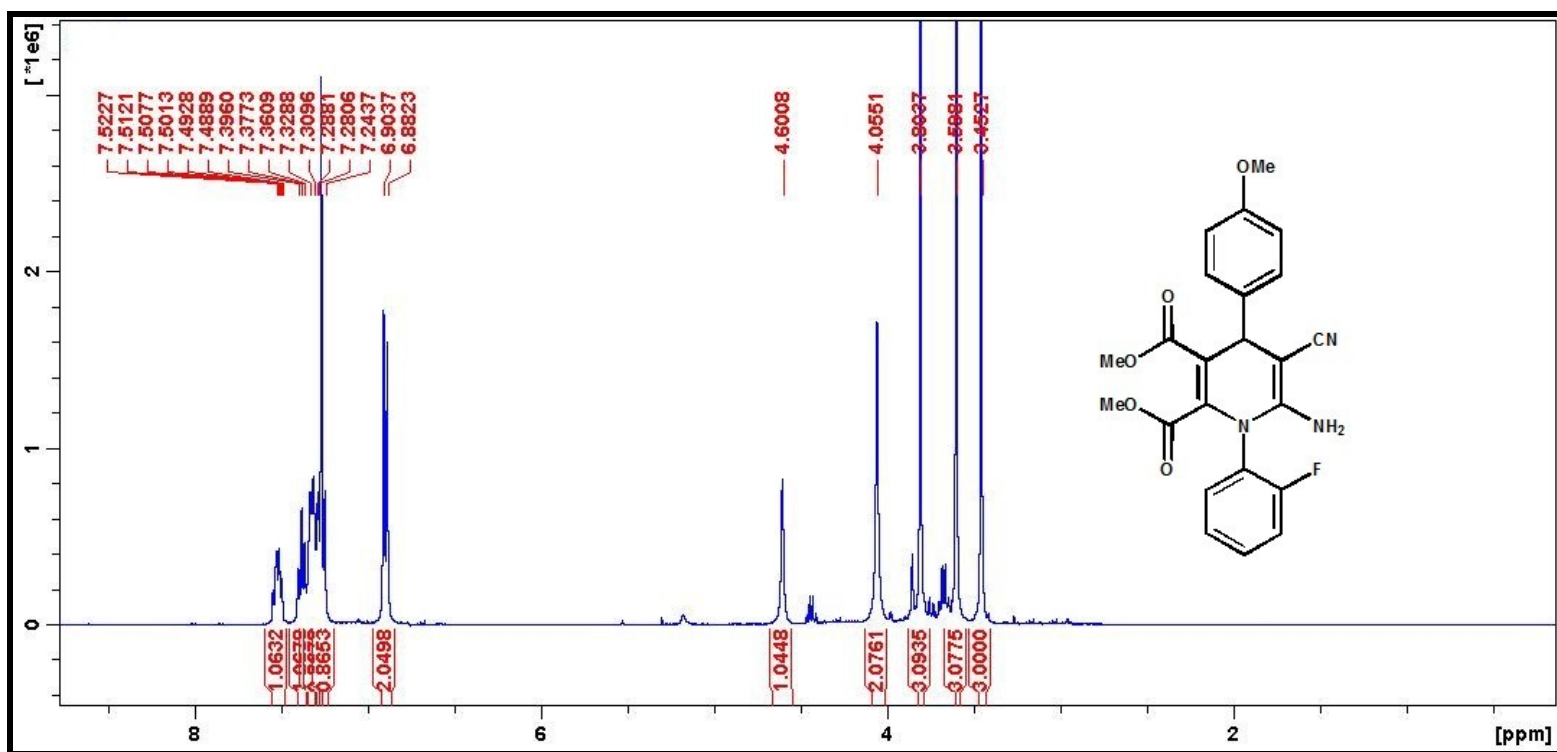

<sup>1</sup>H NMR spectra of 5k

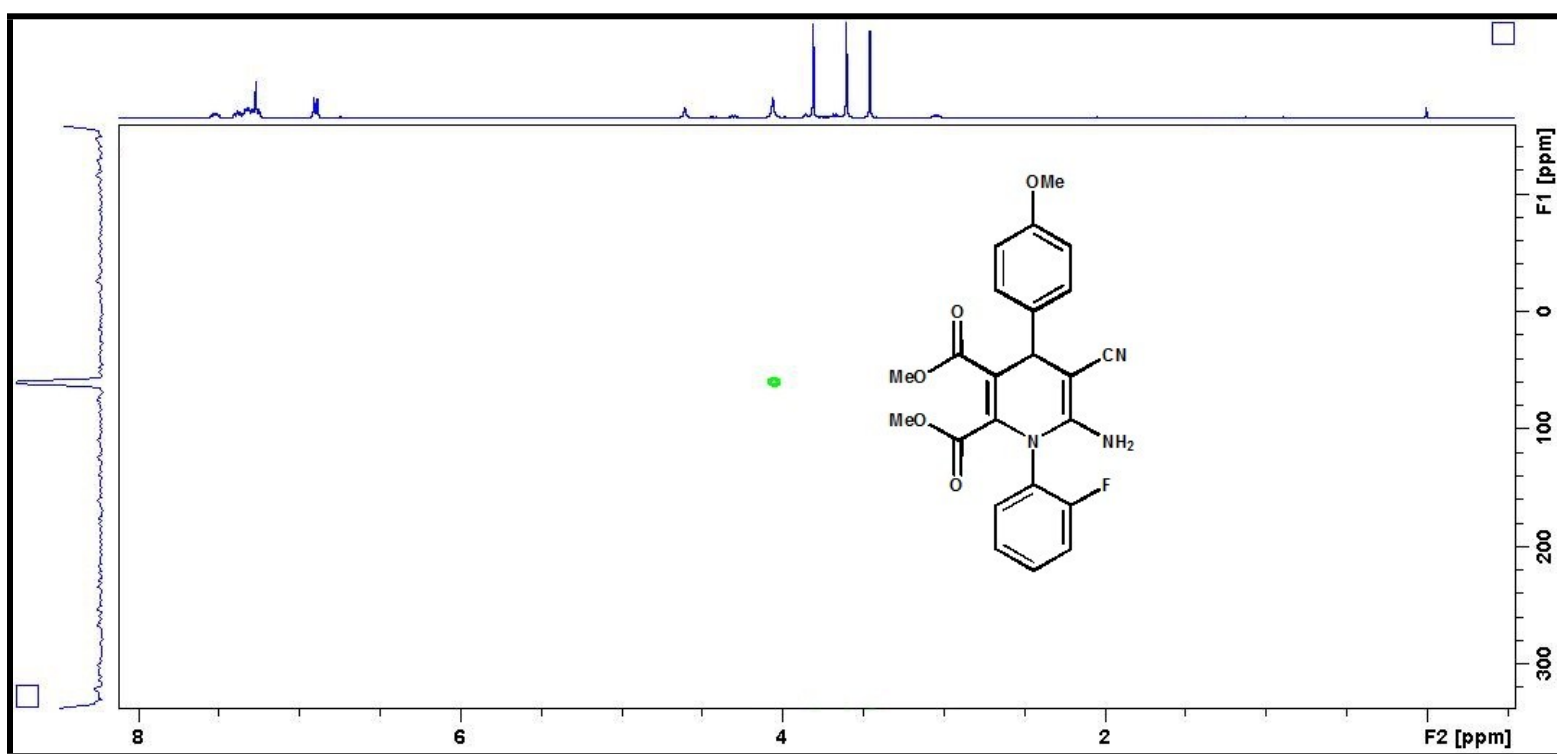

<sup>15</sup>N NMR spectra of 5k

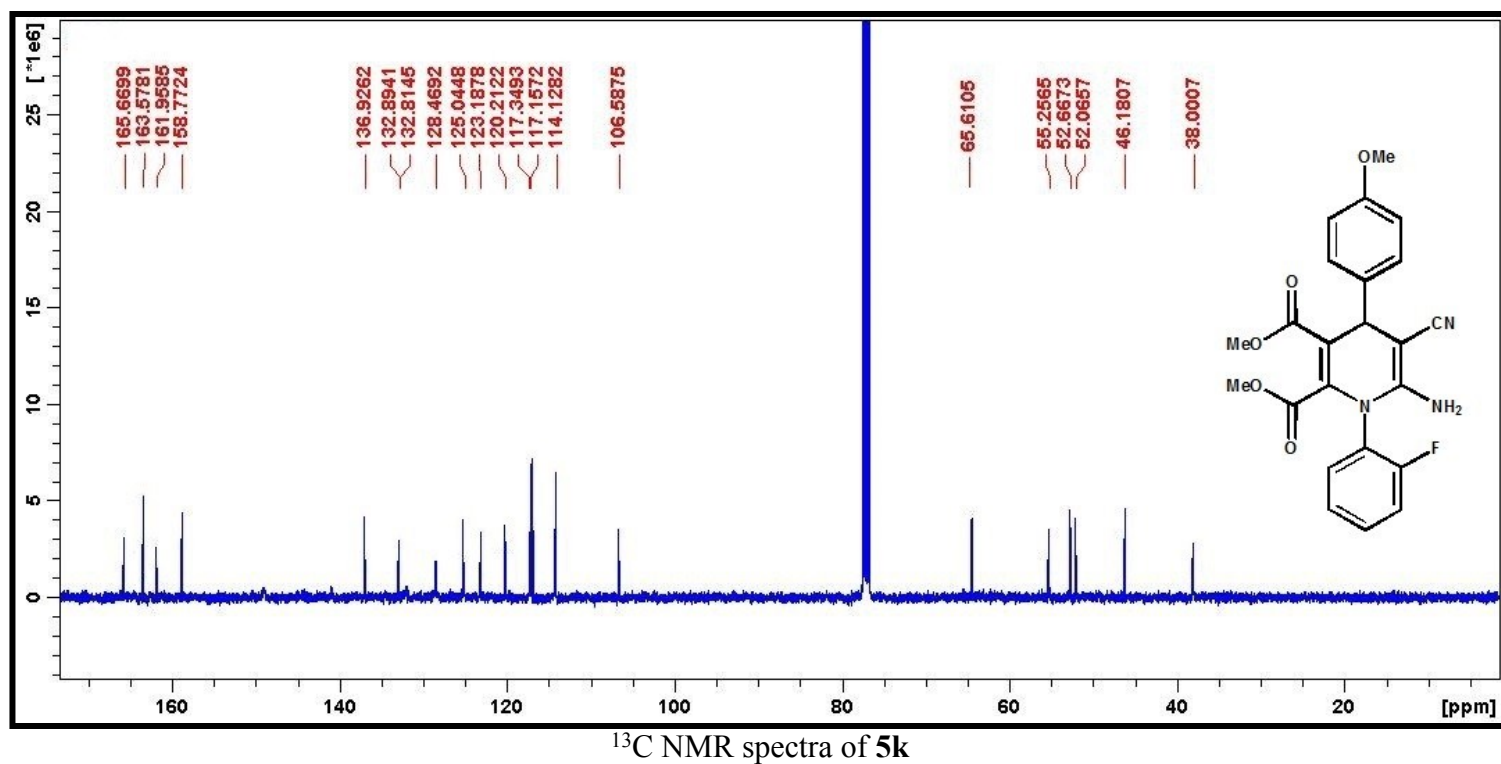

## Elemental Composition Report

Page 1

### Single Mass Analysis

Tolerance = 5.0 PPM / DBE: min = -1.5, max = 100.0

Element prediction: Off

Number of isotope peaks used for i-FIT = 3

Monoisotopic Mass, Even Electron Ions

28 formula(e) evaluated with 1 results within limits (up to 20 closest results for each mass)

Elements Used:

C: 20-25 H: 20-25 N: 0-5 O: 0-5 F: 0-1

F1 2 (0.034) Cm (1:61)

TOF MS ES+

9.44e+004

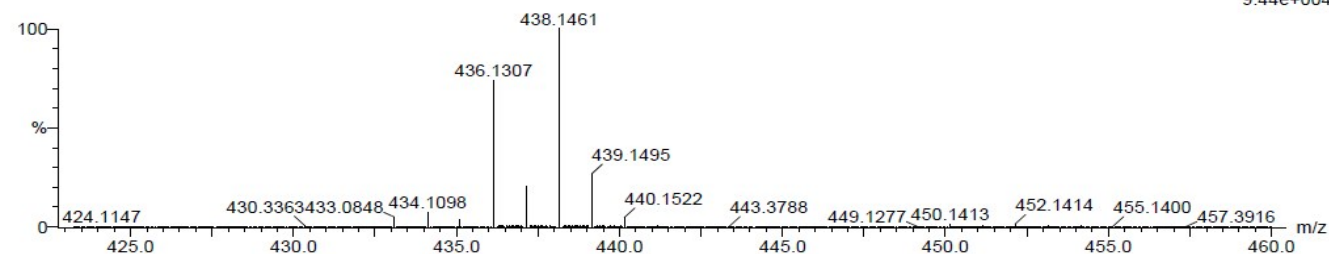

Minimum:

Maximum:

5.0

5.0

-1.5

100.0

Mass

Calc. Mass

mDa

PPM

DBE

i-FIT

i-FIT (Norm)

Formula

438.1461

438.1465

-0.4

-0.9

14.5

532.1

0.0

C23 H21 N3 O5 F

HRMS spectra of **5k**
